# Supplementary material for: The contribution of non-malarial febrile illness co-infections to Plasmodium falciparum case counts in health facilities in sub-Saharan Africa
Source: Springer Nature journal article supplement (doi:10.1186/s12936-019-2830-y), 2019-06-11

### **Additional File 7**

Additional Figure 1a) Estimates of proportion of fevers amongst malaria-positive presenting to public health clinics that are causally due to MAF (red sections), NMFI accompanied by an asymptomatic *P. falciparum* malaria infection (blue sections) and co-symptomatic MAF and NMFI (yellow sections); and Additional Figure 1 b) as (a), also including NMFI not accompanied by a *P. falciparum* malaria infection (grey sections); amongst febrile children under 5 years of age presenting to public health clinics amongst children from household surveys in 41 country-years in sub-Saharan Africa, 2006-2016.

Additional Figure 1 (a)

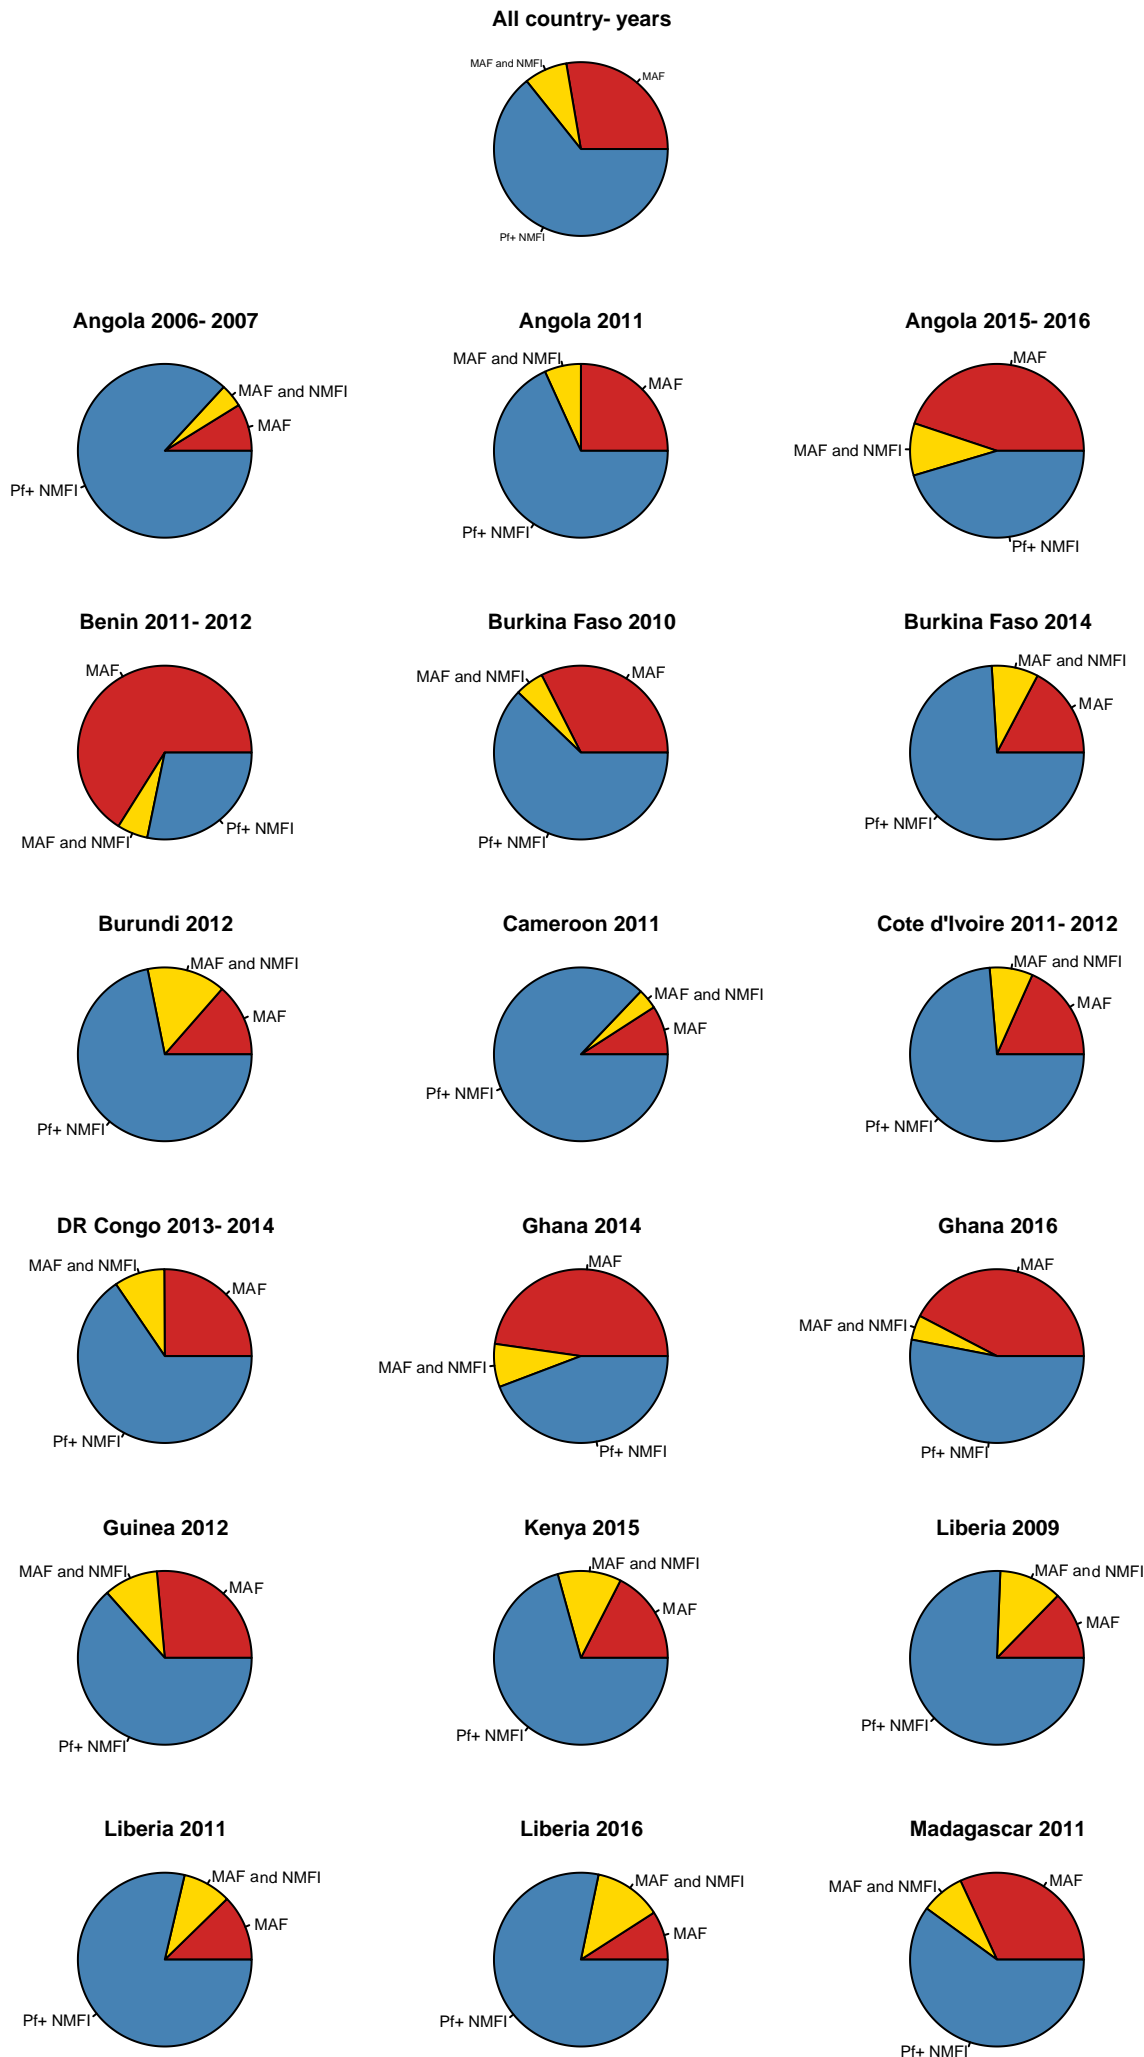

**Madagascar 2013**

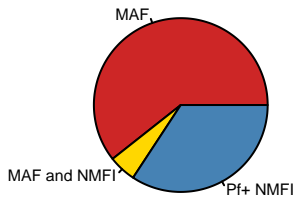

**Madagascar 2016**

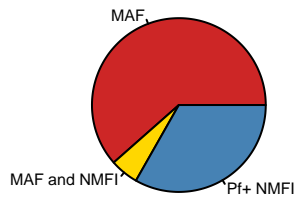

**Malawi 2012**

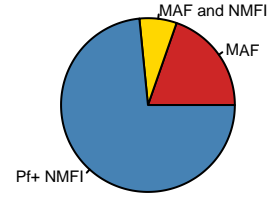

**Malawi 2014**

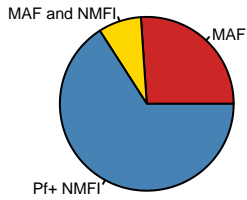

**Mali 2012- 2013**

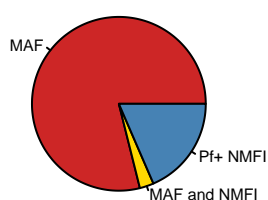

**Mali 2015**

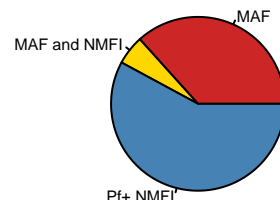

**Mozambique 2011**

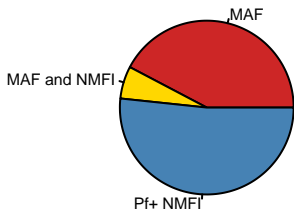

**Mozambique 2015**

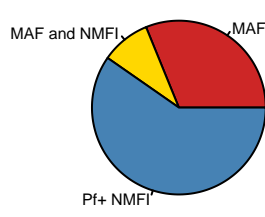

**Nigeria 2010**

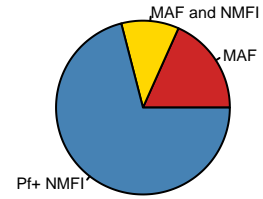

**Nigeria 2015**

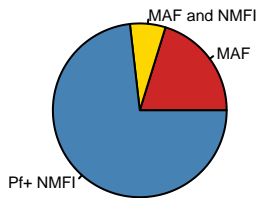

**Rwanda 2010**

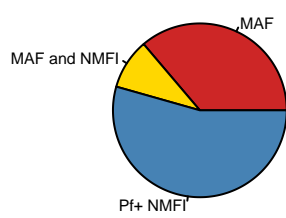

**Rwanda 2014- 2015**

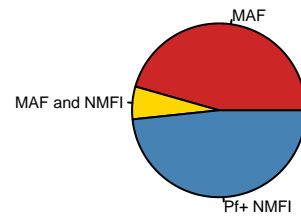

**Senegal 2008- 2009**

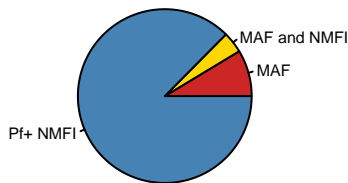

**Senegal 2010- 2011**

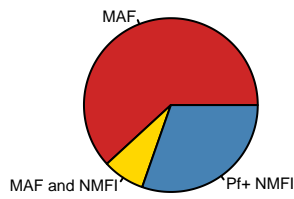

**Senegal 2012- 2013**

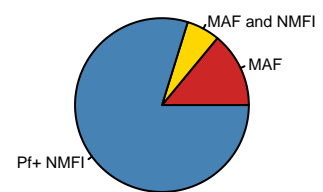

**Senegal 2015**

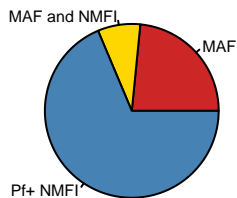

**Tanzania 2007- 2008**

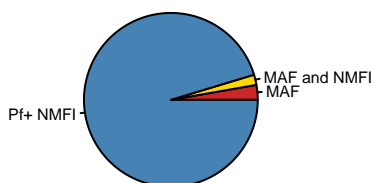

**Tanzania 2011- 2012**

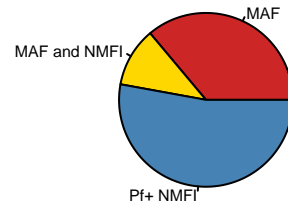

**Tanzania 2015- 2016**

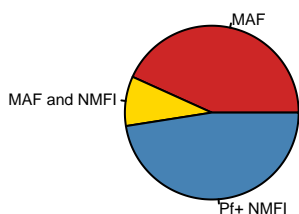

**Togo 2013- 2014**

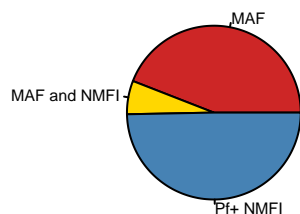

**Uganda 2009**

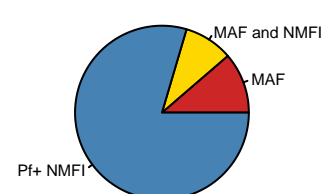

**Uganda 2014- 2015**

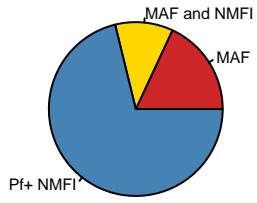

**Uganda 2016**

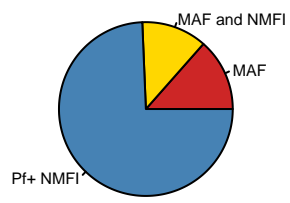

All country-years

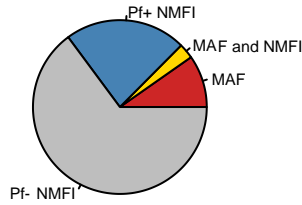

Angola 2006- 2007

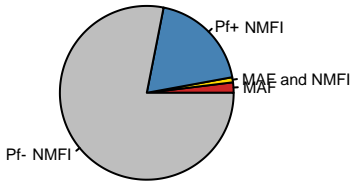

Angola 2011

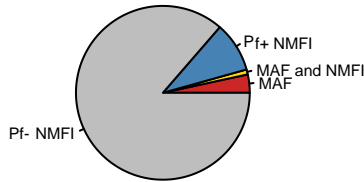

Angola 2015- 2016

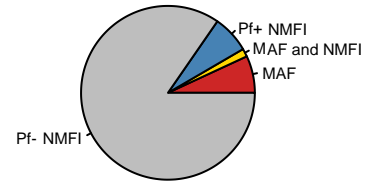

Benin 2011- 2012

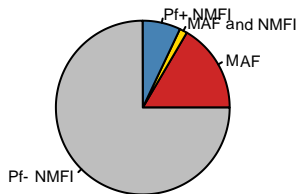

Burkina Faso 2010

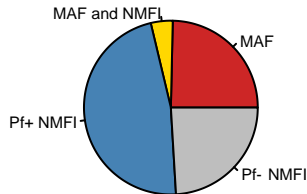

Burkina Faso 2014

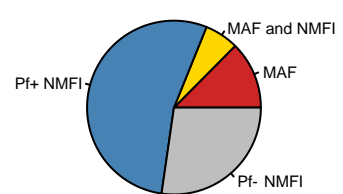

Burundi 2012

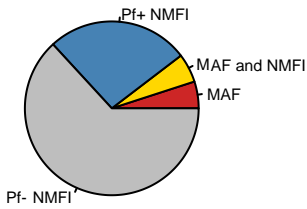

Cameroon 2011

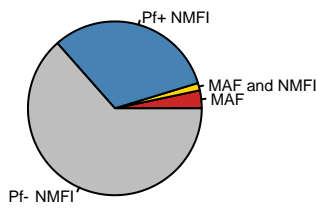

Cote d'Ivoire 2011- 2012

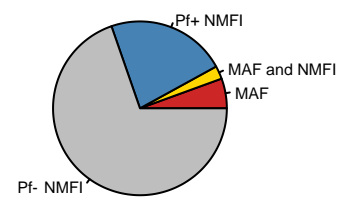

DR Congo 2013- 2014

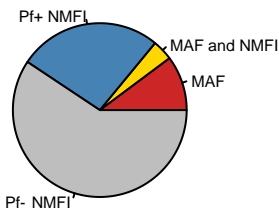

Ghana 2014

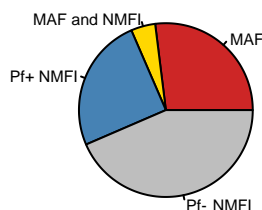

Ghana 2016

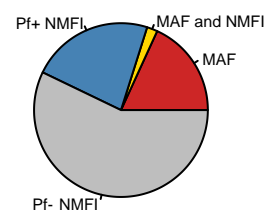

Guinea 2012

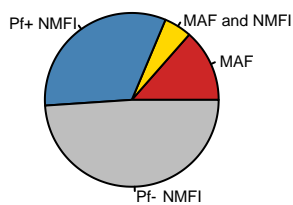

Kenya 2015

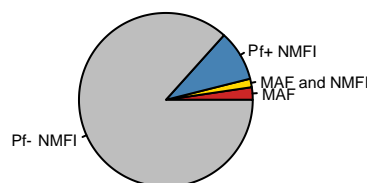

Liberia 2009

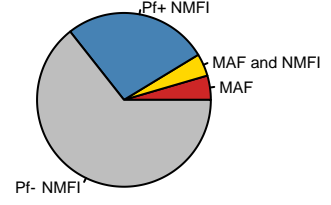

Liberia 2011

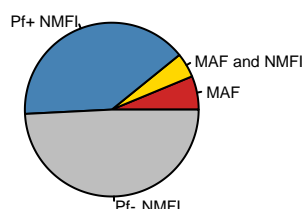

Liberia 2016

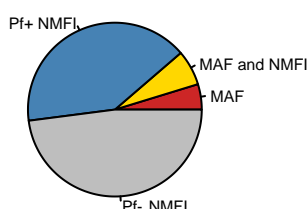

Madagascar 2011

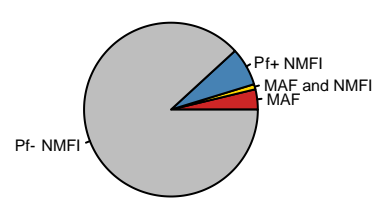



Uganda 2014- 2015

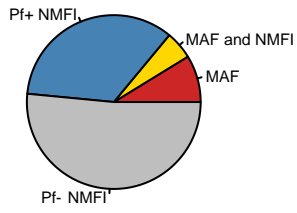

Uganda 2016

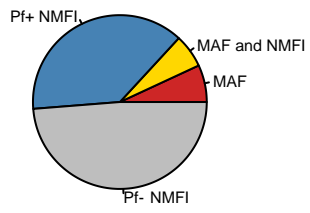

Supplement: MOESM7 [file 16797170]
