# Supplementary material for: The contribution of non-malarial febrile illness co-infections to Plasmodium falciparum case counts in health facilities in sub-Saharan Africa
Source: Springer Nature journal article supplement (doi:10.1186/s12936-019-2830-y), 2019-06-11
Supplement: MOESM1 [file 16797170]

**Additional File 1. Studies and data used for parasite density threshold dataset. For each study, the study *P. falciparum* prevalence in children under 5 years of age ( $PfPR_{0-5}$ ), parasite density threshold used, upper and lower age bounds, and the number or proportion of malaria-positive febrile individuals over and under the parasite density threshold is given.**

| ID | Reference | Study       | Site       | Country  | Publication Year | Year(s) studied | $PfPR_{0-5}$ | Parasite density threshold | AgeLow | AgeUp | $Pf$ Pos under threshold | $Pf$ Pos over threshold | Numeric or Proportion | Proportion over threshold |
|----|-----------|-------------|------------|----------|------------------|-----------------|--------------|----------------------------|--------|-------|--------------------------|-------------------------|-----------------------|---------------------------|
| 1  | 1         | Bloland     | Asembo Bay | Kenya    | 1999             | 1992            | 0.7049       | 1500                       | 0      | 0.4   | 222                      | 320                     | N                     | 0.59                      |
| 2  | 1         | Bloland     | Asembo Bay | Kenya    | 1999             | 1992            | 0.7049       | 6000                       | 0.5    | 0.9   | 221                      | 307                     | N                     | 0.58                      |
| 3  | 1         | Bloland     | Asembo Bay | Kenya    | 1999             | 1992            | 0.7049       | 7000                       | 1      | 2     | 118                      | 179                     | N                     | 0.60                      |
| 4  | 1         | Bloland     | Asembo Bay | Kenya    | 1999             | 1992            | 0.7049       | 7000                       | 2      | 3     | 96                       | 57                      | N                     | 0.37                      |
| 5  | 1         | Bloland     | Asembo Bay | Kenya    | 1999             | 1992            | 0.7049       | 3500                       | 3      | 4     | 191                      | 98                      | N                     | 0.34                      |
| 6  | 2         | Lusingu     | Mgome      | Tanzania | 2004             | 2001            | 0.8120       | 5000                       | 0      | 0.9   | 9.33                     | 16.57                   | N                     | 0.64                      |
| 7  | 2         | Lusingu     | Mgome      | Tanzania | 2004             | 2001            | 0.8120       | 5000                       | 1      | 1     | 7.25                     | 17.13                   | N                     | 0.70                      |
| 8  | 2         | Lusingu     | Mgome      | Tanzania | 2004             | 2001            | 0.8120       | 5000                       | 2      | 2     | 3.15                     | 17.00                   | N                     | 0.84                      |
| 9  | 2         | Lusingu     | Mgome      | Tanzania | 2004             | 2001            | 0.8120       | 5000                       | 3      | 3     | 1.95                     | 1.95                    | N                     | 0.50                      |
| 10 | 2         | Lusingu     | Mgome      | Tanzania | 2004             | 2001            | 0.8120       | 5000                       | 4      | 4     | 5.40                     | 2.40                    | N                     | 0.31                      |
| 11 | 2         | Lusingu     | Ubiri      | Tanzania | 2004             | 2001            | 0.2409       | 1000                       | 2      | 2     | 1.52                     | 3.03                    | N                     | 0.67                      |
| 12 | 2         | Lusingu     | Ubiri      | Tanzania | 2004             | 2001            | 0.2409       | 1000                       | 4      | 4     | 2.73                     | 1.17                    | N                     | 0.30                      |
| 13 | 3         | Molez       | Barkedji   | Senegal  | 2006             | 1994–1995       | 0.0874       | 2500                       | 0      | 4     | 11                       | 12                      | N                     | 0.52                      |
| 14 | 4,5       | Mwangi      | Ngerenya   | Kenya    | 2003;2005        | 1999–2001       | 0.2231       | 10000                      | 0      | 0.9   | 34                       | 41                      | N                     | 0.55                      |
| 15 | 4,5       | Mwangi      | Chonyi     | Kenya    | 2003;2005        | 1999–2001       | 0.3658       | 10000                      | 0      | 0.9   | 50                       | 76                      | N                     | 0.60                      |
| 16 | 4,5       | Mwangi      | Ngerenya   | Kenya    | 2003;2005        | 1999–2001       | 0.2231       | 10000                      | 1      | 5     | 188                      | 546                     | N                     | 0.74                      |
| 17 | 4,5       | Mwangi      | Chonyi     | Kenya    | 2003;2005        | 1999–2001       | 0.3658       | 10000                      | 1      | 5     | 155                      | 371                     | N                     | 0.71                      |
| 18 | 6         | Owusu-Agyei | Kintampo   | Ghana    | 2009             | 2004            | 0.6424       | 20000                      | 0      | 0.9   | 100                      | 45                      | N                     | 0.31                      |
| 19 | 6         | Owusu-Agyei | Kintampo   | Ghana    | 2009             | 2004            | 0.6424       | 20000                      | 1      | 1.9   | 164                      | 146                     | N                     | 0.47                      |
| 20 | 6         | Owusu-Agyei | Kintampo   | Ghana    | 2009             | 2004            | 0.6424       | 20000                      | 2      | 2.9   | 138                      | 108                     | N                     | 0.44                      |
| 21 | 6         | Owusu-Agyei | Kintampo   | Ghana    | 2009             | 2004            | 0.6424       | 20000                      | 3      | 3.9   | 144                      | 80                      | N                     | 0.36                      |
| 22 | 6         | Owusu-Agyei | Kintampo   | Ghana    | 2009             | 2004            | 0.6424       | 20000                      | 4      | 4.9   | 87                       | 46                      | N                     | 0.35                      |
| 23 | 7         | Velema      | Pahou      | Benin    | 1991             | 1989            | 0.4551       | 20000                      | 0      | 3     | 295                      | 30                      | N                     | 0.09                      |
| 24 | 8         | PRISM       | Nagongera  | Uganda   | NA               | 2011            | 0.4740       | 5000                       | 0      | 4     | 4                        | 11                      | N                     | 0.73                      |
| 25 | 8         | PRISM       | Walukuba   | Uganda   | NA               | 2011            | 0.2488       | 5000                       | 0      | 4     | 1                        | 3                       | N                     | 0.75                      |

|    |   |        |       |       |      |           |        |     |   |   |      |      |   |      |
|----|---|--------|-------|-------|------|-----------|--------|-----|---|---|------|------|---|------|
| 26 | 9 | Afrane | Iguhu | Kenya | 2014 | 2007-2009 | 0.0856 | 500 | 0 | 4 | 0.35 | 0.65 | P | 0.65 |
|----|---|--------|-------|-------|------|-----------|--------|-----|---|---|------|------|---|------|

**Additional Table 1 (Continued)**

| ID | Reference | Study   | Site     | Country      | Publication Year | Year(s) studied | PfPR <sub>0-5</sub> | Parasite density threshold | AgeLow | AgeUp | Pf Pos under threshold | Pf Pos over threshold | Numeric or Proportion | Proportion over threshold |
|----|-----------|---------|----------|--------------|------------------|-----------------|---------------------|----------------------------|--------|-------|------------------------|-----------------------|-----------------------|---------------------------|
| 27 | 10        | Cherif  | Sapone   | Burkina Faso | 2017             | 2007            | 0.5566              | 5000                       | 0.5    | 5     | 1301                   | 1138                  | N                     | 0.47                      |
| 28 | 11        | Mugenyi | Ngerenya | Kenya        | 2017             | 2002            | 0.1220              | 2500                       | 1      | 5     | 22                     | 22                    | N                     | 0.50                      |
| 29 | 11        | Mugenyi | Ngerenya | Kenya        | 2017             | 2002-2003       | 0.1017              | 2500                       | 1      | 5     | 34                     | 99                    | N                     | 0.74                      |
| 30 | 11        | Mugenyi | Ngerenya | Kenya        | 2017             | 2003            | 0.1360              | 2500                       | 1      | 5     | 36                     | 61                    | N                     | 0.63                      |
| 31 | 12        | Tiono   | Banfora  | Burkina Faso | 2014             | 2009-2010       | 0.4776              | 5000                       | 0      | 5     | 101                    | 468                   | N                     | 0.82                      |

**References:**

- 1 Bloland PB, Boriga DA, Ruebush TK, *et al.* Longitudinal cohort study of the epidemiology of malaria infections in an area of intense malaria transmission II. Descriptive epidemiology of malaria infection and disease among children. *Am J Trop Med Hyg* 1999; 60: 641–8.
- 2 Lusingu JPA, Vestergaard LS, Mmbando BP, *et al.* Malaria morbidity and immunity among residents of villages with different *Plasmodium falciparum* transmission intensity in North-Eastern Tanzania. *Malar J* 2004; 3: 26.
- 3 Molez J, Diop A, Gaye O, Lemasson J, Fontenille D. Malaria morbidity in Barkedji, village of Ferlo, in Senegal Sahelian area. *Bull la Société Pathol Exot* 2006; 99: 187–90.
- 4 Mwangi TW, Ross A, Snow RW, Marsh K. Case Definitions of Clinical Malaria under Different Transmission Conditions in Kilifi District , Kenya. *J Infect Dis* 2005; 191: 1932–9.
- 5 Mwangi TW, Ross A, Marsh K, Snow RW. The effects of untreated bednets on malaria infection and morbidity on the Kenyan coast. *Trans R Soc Trop Med Hyg* 2003; 97: 369–72.
- 6 Owusu-agyei S, Asante KP, Adjuik M, *et al.* Epidemiology of malaria in the forest-savanna transitional zone of Ghana. *Malar J* 2009; 8: 220.
- 7 Velema JP, Alihonou EM, Chippaud J-P, Boxel Y van, Gbedj E, Adegbini R. Malaria morbidity and mortality in children under three years of age on the coast of Benin, West Africa. *Trans R Soc Trop Med Hyg* 1991; 85: 430–5.
- 8 PRISM dataset available at: <https://clinepidb.org>
- 9 Afrane YA, Zhou G, Githeko AK, Yan G. Clinical malaria case definition and malaria attributable fraction in the highlands of western Kenya. *Malar J* 2014; 13:405.
- 10 Cherif MK, Ouédraogo O, Sanou GS, *et al.* Antibody responses to *P. falciparum* blood stage antigens and incidence of clinical malaria in children living in endemic area in Burkina Faso. *BMC Res Notes* 2017; 10: 472.
- 11 Mugenyi CK, Elliott SR, Yap XZ, *et al.* Declining Malaria Transmission Differentially Impacts the Maintenance of Humoral Immunity to *Plasmodium falciparum* in Children. *J Infect Dis* 2017; 216: 887–98.

Tiono AB, Kangoye DT, Rehman AM, *et al.* Malaria Incidence in Children in South-West Burkina Faso : Comparison of Active and Passive Case Detection Methods. *PLoS One* 2014; 9: e86936.
