# Supplementary material for: The contribution of non-malarial febrile illness co-infections to Plasmodium falciparum case counts in health facilities in sub-Saharan Africa
Source: Springer Nature journal article supplement (doi:10.1186/s12936-019-2830-y), 2019-06-11
Supplement: MOESM2 [file 16797170]

**Additional File 2. Household survey data utilised for (i) modelling relationship between MAF and PfPR, and (ii) modelling proportion of MAF and NMFI cases seeking treatment in clinics. P+/- refers to the number of children *P. falciparum* positive/negative at time of interview. F+/- refers to the number of children for whom fever was/was not recalled in the two weeks preceding the survey.**

| Country                          | Survey start year | Survey start month | Survey end year | Survey end month | N    | P+F+ | P+F- | P-F+ | P-F- | Sought treatment (public) | Sought treatment (any) |
|----------------------------------|-------------------|--------------------|-----------------|------------------|------|------|------|------|------|---------------------------|------------------------|
| Angola                           | 2006              | 12                 | 2007            | 1                | 1156 | 73   | 210  | 170  | 703  | 93                        | 119                    |
| Angola                           | 2011              | 1                  | 2011            | 6                | 2914 | 173  | 181  | 903  | 1657 | 554                       | 610                    |
| Angola                           | 2015              | 12                 | 2016            | 1                | 3012 | 114  | 344  | 368  | 2186 | 146                       | 258                    |
| Benin                            | 2011              | 12                 | 2012            | 1                | 3119 | 125  | 682  | 240  | 2072 | 99                        | 158                    |
| Burkina Faso                     | 2010              | 5                  | 2010            | 12               | 5640 | 1020 | 3235 | 317  | 1068 | 699                       | 744                    |
| Burkina Faso                     | 2014              | 9                  | 2014            | 12               | 5448 | 1768 | 1756 | 616  | 1308 | 1385                      | 1468                   |
| Burundi                          | 2012              | 12                 | 2013            | 1                | 3465 | 473  | 226  | 1024 | 1742 | 730                       | 870                    |
| Cameroon                         | 2011              | 1                  | 2011            | 8                | 4511 | 633  | 747  | 759  | 2372 | 310                       | 777                    |
| Cote d'Ivoire                    | 2011              | 12                 | 2012            | 1                | 2638 | 345  | 828  | 359  | 1106 | 178                       | 260                    |
| Democratic Republic of the Congo | 2013              | 12                 | 2014            | 1                | 6996 | 1029 | 1401 | 1288 | 3278 | 794                       | 1194                   |
| Ghana                            | 2014              | 9                  | 2014            | 12               | 2341 | 210  | 734  | 178  | 1219 | 204                       | 297                    |
| Ghana                            | 2016              | 10                 | 2016            | 11               | 1423 | 168  | 308  | 253  | 694  | 165                       | 256                    |
| Guinea                           | 2012              | 6                  | 2012            | 10               | 2741 | 503  | 671  | 445  | 1122 | 267                       | 383                    |
| Kenya                            | 2015              | 7                  | 2015            | 8                | 2845 | 153  | 85   | 982  | 1625 | 583                       | 796                    |
| Liberia                          | 2008              | 12                 | 2009            | 1                | 3024 | 523  | 511  | 933  | 1057 | 548                       | 1056                   |
| Liberia                          | 2011              | 9                  | 2011            | 12               | 2333 | 710  | 468  | 654  | 501  | 564                       | 930                    |
| Liberia                          | 2016              | 9                  | 2016            | 11               | 2108 | 501  | 519  | 431  | 657  | 480                       | 560                    |
| Madagascar                       | 2011              | 3                  | 2011            | 5                | 5212 | 113  | 210  | 748  | 4141 | 235                       | 358                    |
| Madagascar                       | 2013              | 4                  | 2013            | 6                | 4476 | 79   | 199  | 537  | 3661 | 219                       | 313                    |
| Madagascar                       | 2016              | 4                  | 2016            | 7                | 3139 | 34   | 71   | 459  | 2575 | 224                       | 281                    |
| Malawi                           | 2012              | 3                  | 2012            | 4                | 1890 | 366  | 352  | 267  | 905  | 283                       | 376                    |
| Malawi                           | 2014              | 5                  | 2014            | 6                | 1717 | 262  | 238  | 271  | 946  | 279                       | 366                    |
| Mali                             | 2012              | 12                 | 2013            | 1                | 4108 | 231  | 1547 | 183  | 2147 | 111                       | 168                    |
| Mali                             | 2015              | 9                  | 2015            | 11               | 6618 | 788  | 1132 | 1225 | 3473 | 688                       | 928                    |
| Mozambique                       | 2011              | 5                  | 2011            | 12               | 4323 | 279  | 1188 | 330  | 2526 | 355                       | 367                    |
| Mozambique                       | 2015              | 6                  | 2015            | 9                | 3709 | 493  | 715  | 580  | 1921 | 690                       | 710                    |
| Nigeria                          | 2010              | 10                 | 2010            | 12               | 4302 | 905  | 1115 | 724  | 1558 | 447                       | 1391                   |

**Additional File 3 (Continued)**

| Country  | Survey start year | Survey start month | Survey end year | Survey end month | N    | P+F+ | P+F- | P-F+ | P-F- | Sought treatment (public) | Sought treatment (any) |
|----------|-------------------|--------------------|-----------------|------------------|------|------|------|------|------|---------------------------|------------------------|
| Nigeria  | 2015              | 10                 | 2015            | 11               | 4920 | 1158 | 861  | 1048 | 1853 | 429                       | 1427                   |
| Rwanda   | 2010              | 12                 | 2011            | 1                | 3619 | 21   | 58   | 595  | 2945 | 302                       | 338                    |
| Rwanda   | 2014              | 12                 | 2015            | 1                | 3110 | 105  | 125  | 521  | 2359 | 338                       | 386                    |
| Senegal  | 2008              | 12                 | 2009            | 1                | 3519 | 176  | 248  | 1007 | 2088 | 408                       | 518                    |
| Senegal  | 2010              | 12                 | 2011            | 1                | 3278 | 27   | 81   | 695  | 2475 | 249                       | 321                    |
| Senegal  | 2012              | 12                 | 2013            | 1                | 5274 | 82   | 135  | 898  | 4159 | 391                       | 489                    |
| Senegal  | 2015              | 2                  | 2015            | 11               | 5441 | 21   | 37   | 928  | 4455 | 418                       | 508                    |
| Tanzania | 2007              | 12                 | 2008            | 1                | 5576 | 240  | 456  | 792  | 4088 | 584                       | 764                    |
| Tanzania | 2011              | 12                 | 2012            | 1                | 6379 | 249  | 331  | 1184 | 4615 | 685                       | 1070                   |
| Tanzania | 2015              | 12                 | 2016            | 1                | 7366 | 291  | 564  | 1087 | 5424 | 209                       | 1110                   |
| Togo     | 2013              | 12                 | 2014            | 1                | 2844 | 309  | 731  | 367  | 1437 | 219                       | 312                    |
| Uganda   | 2009              | 12                 | 2010            | 2                | 3361 | 1037 | 710  | 570  | 1044 | 699                       | 1319                   |
| Uganda   | 2014              | 12                 | 2015            | 1                | 4022 | 642  | 655  | 682  | 2043 | 541                       | 1037                   |
| Uganda   | 2016              | 6                  | 2016            | 12               | 2753 | 583  | 291  | 532  | 1347 | 444                       | 743                    |

All surveys can be obtained with permission from the DHS Program: <https://dhsprogram.com/>
