# Supplementary material for: The contribution of non-malarial febrile illness co-infections to Plasmodium falciparum case counts in health facilities in sub-Saharan Africa
Source: Springer Nature journal article supplement (doi:10.1186/s12936-019-2830-y), 2019-06-11
Supplement: MOESM5 [file 16797170]

## Additional File 5. Details of covariates used in MAF-NMFI modelling approach

Three model-derived spatiotemporal estimates were utilised as predictor variables for probabilistic attribution of MAF or non-malarial febrile illness (NMFI) for each febrile individual within the household survey dataset. In order to increase computational efficiency whilst retaining use of the large repository of remotely-sensed data and malaria-related health metrics created and/or collated within the Malaria Atlas Project database, three modelled estimates that incorporate these metrics as predictor variables were used. These three predictor variables were: *i*)  $PfPR_{0-5}$ , *ii*) suitability for fever without a malaria infection in children under 5 years of age, and *iii*) caregivers' propensity to seek treatment for fever of any cause for children less than 5 years of age. All three variables were generated as cartographic predictions, at a 5km x 5km resolution within areas of stable *P. falciparum* transmission across sub-Saharan Africa, and are described in full below.

The  $PfPR_{0-5}$  variable was generated by age-transforming estimates of malaria prevalence via microscopy diagnosis in children 2-10 years of age in Africa, as presented by Bhatt and colleagues,<sup>7</sup> using the 'agestand' package in the R programming language, based on the age-standardisation procedure for  $PfPR$  described by Smith *et al.*<sup>1</sup> These estimates were then standardised to RDT-based prevalence estimates of malaria using the methods described by Mappin *et al.*<sup>2</sup>

The remaining two covariates were generated using a boosted regression tree (BRT) approach, and are henceforth referred to as "BRT<sub>bg</sub>" for suitability for fever without a malaria infection (a "background" fever, hence BRT<sub>bg</sub>), and "BRT<sub>treat</sub>" for propensity for all-cause fever treatment-seeking. The approach used is an adapted version of a methodology outlined previously.<sup>3</sup> To generate the two BRT variables, a training dataset was constructed, comprised of the household survey data points described above aggregated into 5km x 5km groups (to match the resolution of the predictor variables), including only clusters with more than ten children interviewed (to remove outliers due to small sample sizes), resulting in a training dataset of 5,262 clusters. For the BRT<sub>bg</sub> model, the response variable was the empirical logit of the prevalence of fever without an RDT-patent malaria infection. For the BRT<sub>treat</sub> model, the response was the empirical logit of the treatment-seeking rate amongst febrile individuals within each cluster. For both of these models, a suite of 157 environmental and socio-demographic covariates were initially assembled. These covariates, for the area of stable *P. falciparum* transmission in Africa, included 5km x 5km resolution remotely-sensed covariates (and derived products of remotely sensed variables),<sup>4</sup> and annual national-level demographic and poverty indicators supplied by the World Bank.<sup>5</sup> The World Bank data were incomplete for a number of country years, and were gap-filled using a Gaussian process regression approach. The temporal resolution of these datasets was either monthly, yearly, or stationary across the study period. Full details of the variables used and each variable's contribution to each final BRT model are given below.

For both the BRT<sub>bg</sub> and BRT<sub>treat</sub> covariates, a BRT model using the response dataset and the 157 covariate layers was constructed in the 'dismo' package in R developed by Elith *et al.*<sup>6</sup> The BRT split response data repeatedly by covariates, and the covariates that maximised the homogeneity of each of the two partitioned response datasets were selected more frequently in subsequent steps. The regression tree models were then "boosted", where models were combined to reduce overall predictive deviance. Both models were parameterised using a tree complexity of 5, a learning rate of 0.01, and the number of trees was determined by the optimal solution found by the 'gbm.step' function. Spatial predictions of BRT<sub>bg</sub> and BRT<sub>treat</sub> were generated across stable *P. falciparum* transmission zones in sub-Saharan Africa on a monthly basis from January 2006 to December 2016. Any gaps in these modelled predictions, caused by areas of missing data in the remotely sensed covariates, were filled with the average value from the nine surrounding cells.

## References

- 1 Smith DL, Guerra CA, Snow RW, Hay SI. Standardizing estimates of the *Plasmodium falciparum* parasite rate. *Malar J* 2007; **6**. DOI:10.1186/1475-2875-6-131.
- 2 Mappin B, Cameron E, Dalrymple U, *et al.* Standardizing *Plasmodium falciparum* infection prevalence measured via microscopy versus rapid diagnostic test. *Malar J* 2015; **14**. DOI:10.1186/s12936-015-0984-9.
- 3 Dalrymple U, Cameron E, Bhatt S, Weiss DJ, Gupta S, Gething PW. Quantifying the contribution of *Plasmodium falciparum* malaria to febrile illness amongst African children. *Elife* 2017; **6**: e29198.

- 4 Weiss DJ, Mappin B, Dalrymple U, *et al.* Re-examining environmental correlates of *Plasmodium falciparum* malaria endemicity: a data-intensive variable selection approach. *Malar J* 2015; **14**. DOI:10.1186/s12936-015-0574-x.
- 5 World Bank. World Bank Open Data. 2017. <http://data.worldbank.org/> (accessed Aug 22, 2017).
- 6 Elith J, Leathwick JR, Hastie T. A working guide to boosted regression trees. *J Anim Ecol* 2008; **77**: 802–13.

**Additional File 5. Predictor variables for BRT model for BRT[bg] listed by contribution to the final model. EVI: Enhanced Vegetation Index; GUF: Global Urban Footprint; LST: Land Surface Temperature; PET - potential evapotranspiration; TCB - Tassled Cap Brightness; TCW - Tassled Cap Wetness; TMI - Topographic Moisture Index; TSI - Temperature Suitability Index; WB - World Bank Variable. “Product” definitions for EVI, LST, TSI, TCW and TCB: Monthly - average value over study month; All-years synoptic - mean EVI for all years 2000-2015; Delta dynamic - difference between monthly value and synoptic product; Monthly synoptic - mean of study month across all years; Delta monthly - difference between study month and monthly synoptic product; Delta annual - difference between study month and study year (e.g. July 2008 - Mean 2008). “Lag” defines the number of months that the covariate dataset lags behind the month of each household survey dataset point (e.g. if a household survey data point is recorded in July 2008, a covariate with a lag of 2 months will be taken from May 2008).**

| Variable name                           | Contribution to final model | Variable Type                                                        | Product type     | Spatial summary    | Temporal resolution | Monthly lag |
|-----------------------------------------|-----------------------------|----------------------------------------------------------------------|------------------|--------------------|---------------------|-------------|
| primary_school                          | 7.203                       | Proportion of children in primary school (WB National)               | -                | N/A                | Yearly              | N/A         |
| pregnant                                | 5.880                       | Percentage of pregnant women who receive prenatal care (WB National) | -                | N/A                | Yearly              | N/A         |
| DPT                                     | 4.373                       | DPT immunisation coverage (WB annual)                                | -                | N/A                | Yearly              | N/A         |
| public_exp                              | 2.656                       | Public expenditure on health system (WB national)                    | -                | N/A                | Yearly              | N/A         |
| GDP_grow                                | 2.604                       | Annual GDP growth (WB national)                                      | -                | N/A                | Yearly              | N/A         |
| prec57p2                                | 1.704                       | Precipitation                                                        | -                | N/A                | Stationary          | N/A         |
| prec57p3                                | 1.618                       | Precipitation                                                        | -                | N/A                | Stationary          | N/A         |
| LST_night_delta_dynamic_mean_1          | 1.252                       | LST night                                                            | Delta dynamic    | Mean               | Fully dynamic       | 1           |
| EVI_delta_annual_min_0                  | 1.237                       | EVI                                                                  | Delta annual     | Minimum            | Delta annual        | 0           |
| LST_night_delta_monthly_range_4         | 1.102                       | LST night                                                            | Delta monthly    | Range              | Fully dynamic       | 4           |
| EVI_delta_monthly_stdev_4               | 1.002                       | EVI                                                                  | Delta monthly    | Standard deviation | Fully dynamic       | 4           |
| LST_delta_delta_annual_mean_0           | 1.002                       | LST delta                                                            | Delta annual     | Mean               | Fully dynamic       | 0           |
| EVI_delta_dynamic_mean_1                | 0.977                       | EVI                                                                  | Delta dynamic    | Mean               | Fully dynamic       | 1           |
| LST_day_delta_annual_max_1              | 0.972                       | LST day                                                              | Delta annual     | Maximum            | Fully dynamic       | 1           |
| TSI.monthly.mean.synoptic.stdev_2       | 0.970                       | TSI                                                                  | Monthly synoptic | Mean               | Month only          | 2           |
| prec57a0                                | 0.924                       | Precipitation                                                        | -                | N/A                | Stationary          | N/A         |
| LST_day.monthly.range.synoptic.stdev_2  | 0.893                       | LST day                                                              | Monthly synoptic | Standard deviation | Month only          | 2           |
| LST_day_delta_dynamic_range_2           | 0.892                       | LST day                                                              | Delta dynamic    | Range              | Fully dynamic       | 2           |
| LST_delta.monthly.mean.synoptic.stdev_0 | 0.875                       | LST delta                                                            | Monthly synoptic | Mean               | Month only          | 0           |
| LST_day_delta_monthly_min_1             | 0.870                       | LST day                                                              | Delta monthly    | Minimum            | Fully dynamic       | 1           |
| TSI_delta_monthly_max_0                 | 0.853                       | TSI                                                                  | Delta monthly    | Maximum            | Fully dynamic       | 0           |
| LST_night_delta_monthly_min_0           | 0.838                       | LST night                                                            | Delta monthly    | Minimum            | Fully dynamic       | 0           |
| prec57p1                                | 0.822                       | Precipitation                                                        | -                | N/A                | Stationary          | N/A         |
| EVI.monthly.min.synoptic.stdev_4        | 0.821                       | EVI                                                                  | Monthly synoptic | Minimum            | Month only          | 4           |
| TSI.monthly.range.synoptic.mean_3       | 0.811                       | TSI                                                                  | Monthly synoptic | Range              | Month only          | 3           |

**Additional File 5 (Continued)**

| Variable name                            | Contribution to final model | Variable Type             | Product type     | Spatial summary    | Temporal resolution | Monthly lag |
|------------------------------------------|-----------------------------|---------------------------|------------------|--------------------|---------------------|-------------|
| TSI_delta_monthly_min_4                  | 0.774                       | TSI                       | Delta monthly    | Minimum            | Fully dynamic       | 4           |
| EVI_delta_monthly_min_1                  | 0.757                       | EVI                       | Delta monthly    | Minimum            | Fully dynamic       | 1           |
| TCB_delta_annual_stdev_4                 | 0.755                       | TCB                       | Delta annual     | Standard deviation | Fully dynamic       | 4           |
| TCB_delta_annual_max_3                   | 0.749                       | TCB                       | Delta annual     | Maximum            | Fully dynamic       | 3           |
| Africa_TMI_90m.max                       | 0.748                       | TMI                       | -                | Maximum            | Stationary          | N/A         |
| accessibility_50k_5km.stdev              | 0.737                       | Accessibility             | -                | Standard deviation | Stationary          | N/A         |
| fraction.class.14                        | 0.735                       | Land cover class fraction | -                | N/A                | Yearly              | N/A         |
| TSI.monthly.mean.synoptic.stdev_3        | 0.732                       | TSI                       | Monthly synoptic | Mean               | Month only          | 3           |
| TCB_delta_monthly_mean_1                 | 0.689                       | TCB                       | Delta monthly    | Mean               | Fully dynamic       | 1           |
| LST_night_delta_dynamic_min_0            | 0.678                       | LST night                 | Delta dynamic    | Minimum            | Fully dynamic       | 0           |
| LST_delta_delta_monthly_mean_0           | 0.672                       | LST delta                 | Delta monthly    | Mean               | Fully dynamic       | 0           |
| TCB.monthly.mean.synoptic.stdev_4        | 0.663                       | TCB                       | Monthly synoptic | Mean               | Month only          | 4           |
| LST_delta.monthly.mean.synoptic.stdev_1  | 0.643                       | LST delta                 | Monthly synoptic | Mean               | Month only          | 1           |
| EVI.monthly.range.synoptic.stdev_2       | 0.640                       | EVI                       | Monthly synoptic | Range              | Month only          | 2           |
| LST_night_delta_dynamic_mean_3           | 0.633                       | LST night                 | Delta dynamic    | Mean               | Fully dynamic       | 3           |
| EVI_delta_monthly_min_0                  | 0.615                       | EVI                       | Delta monthly    | Minimum            | Fully dynamic       | 0           |
| TCW_delta_monthly_mean_1                 | 0.606                       | TCW                       | Delta monthly    | Mean               | Fully dynamic       | 1           |
| LST_day_delta_monthly_stdev_4            | 0.599                       | LST day                   | Delta monthly    | Standard deviation | Fully dynamic       | 4           |
| Africa_TMI_90m.min                       | 0.592                       | TMI                       | -                | Minimum            | Stationary          | N/A         |
| LST_night.monthly.stdev.synoptic.stdev_3 | 0.576                       | LST night                 | Monthly synoptic | Standard deviation | Month only          | 3           |
| EVI_delta_monthly_range_2                | 0.557                       | EVI                       | Delta monthly    | Range              | Fully dynamic       | 2           |
| LST_night.monthly.min.synoptic.stdev_2   | 0.552                       | LST night                 | Monthly synoptic | Minimum            | Month only          | 2           |
| fraction.class.9                         | 0.545                       | Land cover class fraction | -                | N/A                | Yearly              | N/A         |
| TSI_delta_annual_min_4                   | 0.543                       | TSI                       | Delta annual     | Minimum            | Fully dynamic       | 4           |
| LST_night.monthly.range.synoptic.stdev_1 | 0.542                       | LST night                 | Monthly synoptic | Range              | Month only          | 1           |
| TSI_delta_monthly_max_2                  | 0.540                       | TSI                       | Delta monthly    | Maximum            | Fully dynamic       | 2           |
| TSI.monthly.min.synoptic.stdev_4         | 0.539                       | TSI                       | Monthly synoptic | Minimum            | Month only          | 4           |
| TCB_delta_annual_stdev_2                 | 0.538                       | TCB                       | Delta annual     | Standard deviation | Fully dynamic       | 2           |
| LST_night.monthly.mean.synoptic.stdev_0  | 0.516                       | LST night                 | Monthly synoptic | Mean               | Month only          | 0           |
| LST_delta.monthly.max.synoptic.mean_2    | 0.510                       | LST delta                 | Monthly synoptic | Maximum            | Month only          | 2           |
| prec57a3                                 | 0.508                       | Precipitation             | -                | N/A                | Stationary          | N/A         |

**Additional File 5 (Continued)**

| Variable name                            | Contribution to final model | Variable Type                 | Product type       | Spatial summary    | Temporal resolution | Monthly lag |
|------------------------------------------|-----------------------------|-------------------------------|--------------------|--------------------|---------------------|-------------|
| TSI_delta_monthly_stdev_4                | 0.507                       | TSI                           | Delta monthly      | Standard deviation | Fully dynamic       | 4           |
| TCB_monthly_min_1                        | 0.501                       | TCB                           | Monthly            | Minimum            | Fully dynamic       | 1           |
| LST_night_delta_dynamic_max_2            | 0.498                       | LST night                     | Delta dynamic      | Maximum            | Fully dynamic       | 2           |
| LST_day.monthly.range.synoptic.stdev_1   | 0.497                       | LST day                       | Monthly synoptic   | Standard deviation | Month only          | 1           |
| TSI.monthly.range.synoptic.stdev_2       | 0.493                       | TSI                           | Monthly synoptic   | Standard deviation | Month only          | 2           |
| LST_night_delta_monthly_max_3            | 0.488                       | LST night                     | Delta monthly      | Maximum            | Fully dynamic       | 3           |
| LST_night.monthly.stdev.synoptic.stdev_0 | 0.487                       | LST night                     | Monthly synoptic   | Standard deviation | Month only          | 0           |
| LST_night_delta_monthly_mean_4           | 0.481                       | LST night                     | Delta monthly      | Mean               | Fully dynamic       | 4           |
| LST_night_delta_monthly_max_2            | 0.478                       | LST night                     | Delta monthly      | Maximum            | Fully dynamic       | 2           |
| LST_night_delta_annual_max_2             | 0.477                       | LST night                     | Delta annual       | Maximum            | Fully dynamic       | 2           |
| TSI_delta_monthly_range_3                | 0.474                       | TSI                           | Delta monthly      | Range              | Fully dynamic       | 3           |
| TCB_delta_annual_range_1                 | 0.454                       | TCB                           | Delta annual       | Range              | Fully dynamic       | 1           |
| LST_night.monthly.stdev.synoptic.stdev_2 | 0.449                       | LST night                     | Monthly synoptic   | Standard deviation | Month only          | 2           |
| LST_day.monthly.stdev.synoptic.stdev_3   | 0.444                       | LST day                       | Monthly synoptic   | Standard deviation | Month only          | 3           |
| TSI_delta_monthly_mean_1                 | 0.444                       | TSI                           | Delta monthly      | Mean               | Fully dynamic       | 1           |
| LST_day_delta_monthly_max_4              | 0.439                       | LST day                       | Delta monthly      | Maximum            | Fully dynamic       | 4           |
| TCW_delta_annual_stdev_0                 | 0.436                       | TCW                           | Delta annual       | Standard deviation | Fully dynamic       | 0           |
| LST_day_delta_dynamic_stdev_0            | 0.435                       | LST day                       | Delta dynamic      | Standard deviation | Fully dynamic       | 0           |
| EVI.monthly.mean.synoptic.stdev_2        | 0.435                       | EVI                           | Monthly synoptic   | Standard deviation | Month only          | 2           |
| EVI_all_years_synoptic_min               | 0.431                       | EVI                           | All-years synoptic | Minimum            | Stationary          | N/A         |
| EVI.monthly.stdev.synoptic.stdev_4       | 0.429                       | EVI                           | Monthly synoptic   | Standard deviation | Month only          | 4           |
| EVI_delta_dynamic_min_4                  | 0.427                       | EVI                           | Delta dynamic      | Minimum            | Fully dynamic       | 4           |
| EVI_delta_monthly_stdev_0                | 0.423                       | EVI                           | Delta monthly      | Standard deviation | Fully dynamic       | 0           |
| LST_night.monthly.mean.synoptic.stdev_1  | 0.415                       | LST night                     | Monthly synoptic   | Mean               | Month only          | 1           |
| LST_night.monthly.max.synoptic.stdev_4   | 0.413                       | LST night                     | Monthly synoptic   | Maximum            | Month only          | 4           |
| TCW_delta_monthly_mean_4                 | 0.413                       | TCW                           | Delta monthly      | Mean               | Fully dynamic       | 4           |
| population_covariates                    | 0.412                       | Population density            | -                  | N/A                | Yearly              | N/A         |
| LST_night_delta_dynamic_stdev_0          | 0.410                       | LST night                     | Delta dynamic      | Standard deviation | Fully dynamic       | 0           |
| Africa_FA_90m.mean                       | 0.409                       | Elevation (flow accumulation) | -                  | Mean               | Stationary          | N/A         |
| TCW_monthly_stdev_3                      | 0.408                       | TCW                           | Monthly            | Standard deviation | Fully dynamic       | 3           |
| TSI.monthly.max.synoptic.stdev_4         | 0.407                       | TSI                           | Monthly synoptic   | Maximum            | Month only          | 4           |

**Additional File 5 (Continued)**

| Variable name                           | Contribution to final model | Variable Type                  | Product type     | Spatial summary    | Temporal resolution | Monthly lag |
|-----------------------------------------|-----------------------------|--------------------------------|------------------|--------------------|---------------------|-------------|
| EVI_delta_monthly_min_2                 | 0.403                       | EVI                            | Delta monthly    | Minimum            | Fully dynamic       | 2           |
| LST_day_delta_monthly_range_1           | 0.403                       | LST day                        | Delta monthly    | Range              | Fully dynamic       | 1           |
| EVI_delta_monthly_stdev_1               | 0.400                       | EVI                            | Delta monthly    | Standard deviation | Fully dynamic       | 1           |
| adjacencies.class.8                     | 0.398                       | Land cover adjacencies         | -                | N/A                | Yearly              | N/A         |
| LST_day.monthly.min.synoptic.stdev_2    | 0.395                       | LST day                        | Monthly synoptic | Minimum            | Month only          | 2           |
| TCW_delta_monthly_mean_0                | 0.394                       | TCW                            | Delta monthly    | Mean               | Fully dynamic       | 0           |
| TSI_delta_monthly_max_4                 | 0.389                       | TSI                            | Delta monthly    | Maximum            | Fully dynamic       | 4           |
| PET_1950.2000_5km.stdev                 | 0.388                       | PET                            | -                | Standard deviation | Stationary          | N/A         |
| viirs_nighttime_5km.mean                | 0.385                       | Nighttime lights               | -                | Mean               | Stationary          | N/A         |
| EVI.monthly.range.synoptic.stdev_0      | 0.380                       | EVI                            | Monthly synoptic | Range              | Month only          | 0           |
| LST_day_delta_annual_stdev_3            | 0.379                       | LST day                        | Delta annual     | Standard deviation | Fully dynamic       | 3           |
| Global_Urban_Footprint_5km_PropUrban    | 0.379                       | Proportion urban in cell (GUF) | -                | N/A                | Stationary          | N/A         |
| LST_night.monthly.range.synoptic.mean_1 | 0.375                       | LST night                      | Monthly synoptic | Range              | Month only          | 1           |
| fraction.class.2                        | 0.369                       | Land cover class fraction      | -                | N/A                | Yearly              | N/A         |
| TCW_delta_annual_stdev_3                | 0.358                       | TCW                            | Delta annual     | Standard deviation | Fully dynamic       | 3           |
| LST_night_delta_annual_range_1          | 0.356                       | LST night                      | Delta annual     | Range              | Fully dynamic       | 1           |
| population_density_5km.min              | 0.355                       | Population density             | -                | Minimum            | Stationary          | N/A         |
| LST_day_delta_monthly_min_3             | 0.350                       | LST day                        | Delta monthly    | Minimum            | Fully dynamic       | 3           |
| LST_day_delta_monthly_range_0           | 0.348                       | LST day                        | Delta monthly    | Range              | Fully dynamic       | 0           |
| EVI_delta_dynamic_stdev_1               | 0.346                       | EVI                            | Delta dynamic    | Standard deviation | Fully dynamic       | 1           |
| LST_day.monthly.stdev.synoptic.stdev_4  | 0.341                       | LST day                        | Monthly synoptic | Standard deviation | Month only          | 4           |
| TCW_delta_monthly_mean_2                | 0.341                       | TCW                            | Delta monthly    | Mean               | Fully dynamic       | 2           |
| TSI_delta_monthly_stdev_2               | 0.340                       | TSI                            | Delta monthly    | Standard deviation | Fully dynamic       | 2           |
| TCB_delta_monthly_mean_0                | 0.339                       | TCB                            | Delta monthly    | Mean               | Fully dynamic       | 0           |
| TCB_delta_dynamic_mean_4                | 0.337                       | TCB                            | Delta monthly    | Mean               | Fully dynamic       | 4           |
| prec57a1                                | 0.335                       | Precipitation                  | -                | N/A                | Stationary          | N/A         |
| TCW_delta_monthly_mean_3                | 0.332                       | TCW                            | Delta monthly    | Mean               | Fully dynamic       | 3           |
| TCB_delta_monthly_mean_4                | 0.330                       | TCB                            | Delta monthly    | Mean               | Fully dynamic       | 4           |
| TSI.monthly.min.synoptic.stdev_0        | 0.329                       | TSI                            | Monthly synoptic | Minimum            | Month only          | 0           |
| LST_day.monthly.mean.synoptic.stdev_3   | 0.325                       | LST day                        | Monthly synoptic | Mean               | Month only          | 3           |
| EVI_delta_dynamic_range_0               | 0.320                       | EVI                            | Delta dynamic    | Range              | Fully dynamic       | 0           |

**Additional File 5 (Continued)**

| Variable name                           | Contribution to final model | Variable Type             | Product type       | Spatial summary    | Temporal resolution | Monthly lag |
|-----------------------------------------|-----------------------------|---------------------------|--------------------|--------------------|---------------------|-------------|
| TCB_monthly_max_4                       | 0.320                       | TCB                       | Monthly            | Maximum            | Fully dynamic       | 4           |
| TSI_delta_monthly_max_3                 | 0.320                       | TSI                       | Delta monthly      | Maximum            | Fully dynamic       | 3           |
| LST_night_delta_monthly_max_1           | 0.318                       | LST night                 | Delta monthly      | Maximum            | Fully dynamic       | 1           |
| LST_delta_delta_monthly_mean_2          | 0.316                       | LST delta                 | Delta monthly      | Mean               | Fully dynamic       | 2           |
| TCB_delta_monthly_mean_2                | 0.312                       | TCB                       | Delta monthly      | Mean               | Fully dynamic       | 2           |
| TSI_delta_monthly_min_2                 | 0.312                       | TSI                       | Delta monthly      | Minimum            | Fully dynamic       | 2           |
| LST_delta_all_years_synoptic_max        | 0.311                       | LST delta                 | All-years synoptic | Maximum            | Stationary          | N/A         |
| LST_night.monthly.stdev.synoptic.mean_4 | 0.311                       | LST night                 | Monthly synoptic   | Standard deviation | Month only          | 4           |
| LST_night_delta_dynamic_max_4           | 0.310                       | LST night                 | Delta dynamic      | Maximum            | Fully dynamic       | 4           |
| EVI_delta_monthly_mean_3                | 0.307                       | EVI                       | Delta monthly      | Mean               | Fully dynamic       | 3           |
| LST_night_delta_monthly_range_0         | 0.295                       | LST night                 | Delta monthly      | Range              | Fully dynamic       | 0           |
| EVI_delta_monthly_range_3               | 0.293                       | EVI                       | Delta monthly      | Range              | Fully dynamic       | 3           |
| LST_night_delta_annual_stdev_3          | 0.281                       | LST night                 | Delta annual       | Standard deviation | Fully dynamic       | 3           |
| LST_night_delta_dynamic_stdev_4         | 0.281                       | LST night                 | Delta dynamic      | Standard deviation | Fully dynamic       | 4           |
| TSI_monthly_stdev_1                     | 0.277                       | TSI                       | Monthly            | Standard deviation | Fully dynamic       | 1           |
| EVI_delta_dynamic_range_4               | 0.276                       | EVI                       | Delta dynamic      | Range              | Fully dynamic       | 4           |
| EVI.monthly.mean.synoptic.stdev_0       | 0.275                       | EVI                       | Monthly synoptic   | Mean               | Month only          | 0           |
| LST_day_delta_monthly_stdev_3           | 0.269                       | LST day                   | Delta monthly      | Standard deviation | Fully dynamic       | 3           |
| fraction.class.5                        | 0.268                       | Land cover class fraction | -                  | N/A                | Yearly              | N/A         |
| prec57a2                                | 0.260                       | Precipitation             | -                  | N/A                | Stationary          | N/A         |
| LST_night_delta_monthly_stdev_2         | 0.256                       | LST night                 | Delta monthly      | Standard deviation | Fully dynamic       | 2           |
| TCW_delta_annual_stdev_1                | 0.253                       | TCW                       | Delta annual       | Standard deviation | Fully dynamic       | 1           |
| TCB_delta_annual_range_3                | 0.247                       | TCB                       | Delta annual       | Range              | Fully dynamic       | 3           |
| TCW_delta_annual_stdev_4                | 0.247                       | TCW                       | Delta annual       | Standard deviation | Fully dynamic       | 4           |
| EVI_delta_monthly_max_2                 | 0.244                       | EVI                       | Delta monthly      | Maximum            | Fully dynamic       | 2           |
| TSI.monthly.mean.synoptic.stdev_1       | 0.241                       | TSI                       | Monthly synoptic   | Mean               | Month only          | 1           |
| TSI_delta_monthly_min_3                 | 0.239                       | TSI                       | Delta monthly      | Minimum            | Fully dynamic       | 3           |
| LST_night_delta_annual_stdev_2          | 0.238                       | LST night                 | Delta annual       | Standard deviation | Fully dynamic       | 2           |
| LST_day.monthly.range.synoptic.mean_4   | 0.231                       | LST day                   | Monthly synoptic   | Range              | Month only          | 4           |
| EVI_all_years_synoptic_range            | 0.229                       | EVI                       | All-years synoptic | Range              | Stationary          | N/A         |
| LST_day_delta_annual_range_4            | 0.226                       | LST day                   | Delta annual       | Range              | Fully dynamic       | 4           |

**Additional File 5 (Continued)**

| Variable name                             | Contribution to final model | Variable Type                   | Product type     | Spatial summary    | Temporal resolution | Monthly lag |
|-------------------------------------------|-----------------------------|---------------------------------|------------------|--------------------|---------------------|-------------|
| LST_day.monthly.range.synoptic.stdev_0    | 0.226                       | LST day                         | Monthly synoptic | Range              | Month only          | 0           |
| TSI_delta_monthly_range_0                 | 0.226                       | TSI                             | Delta monthly    | Range              | Fully dynamic       | 0           |
| LST_delta_delta_annual_max_2              | 0.223                       | LST delta                       | Delta annual     | Maximum            | Fully dynamic       | 2           |
| TCW_delta_annual_stdev_2                  | 0.223                       | TCW                             | Delta annual     | Standard deviation | Fully dynamic       | 2           |
| accessibility_ESRI_5km.range              | 0.222                       | Accessibility                   | -                | Range              | Stationary          | N/A         |
| Africa_TMI_90m.stdev                      | 0.214                       | TMI                             | -                | Standard deviation | Stationary          | N/A         |
| EVI_delta_annual_stdev_2                  | 0.206                       | EVI                             | Delta annual     | Standard deviation | Delta annual        | 2           |
| fraction.class.7                          | 0.206                       | Land cover class fraction       | -                | N/A                | Yearly              | N/A         |
| TCW_delta_dynamic_mean_2                  | 0.200                       | TCW                             | Delta dynamic    | Mean               | Fully dynamic       | 2           |
| fraction.class.12                         | 0.199                       | Land cover class fraction       | -                | N/A                | Yearly              | N/A         |
| LST_night.monthly.min.synoptic.stdev_3    | 0.197                       | LST night                       | Monthly synoptic | Minimum            | Month only          | 3           |
| TSI_monthly_stdev_2                       | 0.188                       | TSI                             | Monthly          | Standard deviation | Fully dynamic       | 2           |
| EVI_delta_monthly_mean_4                  | 0.171                       | EVI                             | Delta monthly    | Mean               | Fully dynamic       | 4           |
| LST_night.monthly.stdev.synoptic.stdev_4  | 0.164                       | LST night                       | Monthly synoptic | Standard deviation | Month only          | 4           |
| EVI_delta_dynamic_stdev_3                 | 0.163                       | EVI                             | Delta dynamic    | Standard deviation | Fully dynamic       | 3           |
| TSI.monthly.range.synoptic.stdev_1        | 0.156                       | TSI                             | Monthly synoptic | Standard deviation | Month only          | 1           |
| population_density_5km.stdev              | 0.145                       | Population density              | -                | Standard deviation | Stationary          | N/A         |
| DMSP_F18_5km.max                          | 0.113                       | Nighttime lights                | -                | Maximum            | Stationary          | N/A         |
| fraction.class.10                         | 0.069                       | Land cover class fraction       | -                | N/A                | Yearly              | N/A         |
| fraction.class.11                         | 0.065                       | Land cover class fraction       | -                | N/A                | Yearly              | N/A         |
| majclass_covariates                       | 0.064                       | Land cover majority class       | -                | N/A                | Yearly              | N/A         |
| Africa_slope_90m.min                      | 0.026                       | Elevation (slope angle)         | -                | Minimum            | Stationary          | N/A         |
| TCW_delta_annual_max_2                    | 0.005                       | TCW                             | Delta annual     | Maximum            | Fully dynamic       | 2           |
| Global_Urban_Footprint_5km_AnyUrban       | 0.000                       | Any urban in cell (GUF)         | -                | N/A                | Stationary          | N/A         |
| Global_Urban_Footprint_5km_SignificantUrb | 0.000                       | Significant urban in cell (GUF) | -                | N/A                | Stationary          | N/A         |
| adjacencies.class.16                      | 0.000                       | Land cover adjacencies          | -                | N/A                | Yearly              | N/A         |



**Additional File 5. Predictor variables for BRT model for BRT[treat] listed by contribution to the final model. EVI: Enhanced Vegetation Index; GUF: Global Urban Footprint; LST: Land Surface Temperature; PET - potential evapotranspiration; TCB - Tassled Cap Brightness; TCW - Tassled Cap Wetness; TMI - Topographic Moisture Index; TSI - Temperature Suitability Index; WB - World Bank Variable. “Product” definitions for EVI, LST, TSI, TCW and TCB: Monthly - average value over study month; All-years synoptic - mean EVI for all years 2000-2015; Delta dynamic - difference between monthly value and synoptic product; Monthly synoptic - mean of study month across all years; Delta monthly - difference between study month and monthly synoptic product; Delta annual - difference between study month and study year (e.g. July 2008 - Mean 2008). “Lag” defines the number of months that the covariate dataset lags behind the month of each household survey dataset point (e.g. if a household survey data point is recorded in July 2008, a covariate with a lag of 2 months will be taken from May 2008).**

| Variable name                           | Contribution to final model | Variable Type                                                        | Product type     | Spatial summary    | Temporal resolution | Monthly lag |
|-----------------------------------------|-----------------------------|----------------------------------------------------------------------|------------------|--------------------|---------------------|-------------|
| GDP_grow                                | 14.157                      | Annual GDP growth (WB national)                                      | -                | N/A                | Yearly              | N/A         |
| public_exp                              | 7.680                       | Public expenditure on health system (WB national)                    | -                | N/A                | Yearly              | N/A         |
| primary_school                          | 3.972                       | Proportion of children in primary school (WB National)               | -                | N/A                | Yearly              | N/A         |
| prec57p3                                | 1.820                       | Precipitation                                                        | -                | N/A                | Stationary          | N/A         |
| LST_delta_delta_annual_max_2            | 1.753                       | LST delta                                                            | Delta annual     | Maximum            | Fully dynamic       | 2           |
| prec57a0                                | 1.701                       | Precipitation                                                        | -                | N/A                | Stationary          | N/A         |
| prec57a1                                | 1.582                       | Precipitation                                                        | -                | N/A                | Stationary          | N/A         |
| LST_night_delta_monthly_max_3           | 1.418                       | LST night                                                            | Delta monthly    | Maximum            | Fully dynamic       | 3           |
| fraction.class.10                       | 1.385                       | Land cover class fraction                                            | -                | N/A                | Yearly              | N/A         |
| pregnant                                | 1.360                       | Percentage of pregnant women who receive prenatal care (WB National) | -                | N/A                | Yearly              | N/A         |
| LST_night_delta_dynamic_max_4           | 1.252                       | LST night                                                            | Delta dynamic    | Maximum            | Fully dynamic       | 4           |
| population_covariates                   | 1.101                       | Population density                                                   | -                | N/A                | Yearly              | N/A         |
| LST_night.monthly.mean.synoptic.stdev_1 | 1.081                       | LST night                                                            | Monthly synoptic | Mean               | Month only          | 1           |
| TSI_delta_monthly_min_3                 | 1.055                       | TSI                                                                  | Delta monthly    | Minimum            | Fully dynamic       | 3           |
| PET_1950.2000_5km.stdev                 | 1.049                       | PET                                                                  | -                | Standard deviation | Stationary          | N/A         |
| TSI_delta_monthly_max_3                 | 1.007                       | TSI                                                                  | Delta monthly    | Maximum            | Fully dynamic       | 3           |
| LST_night_delta_monthly_max_1           | 0.998                       | LST night                                                            | Delta monthly    | Maximum            | Fully dynamic       | 1           |
| EVI_delta_dynamic_min_4                 | 0.965                       | EVI                                                                  | Delta dynamic    | Minimum            | Fully dynamic       | 4           |
| LST_day_delta_monthly_max_4             | 0.956                       | LST day                                                              | Delta monthly    | Maximum            | Fully dynamic       | 4           |
| LST_delta.monthly.mean.synoptic.stdev_1 | 0.949                       | LST delta                                                            | Monthly synoptic | Mean               | Month only          | 1           |

**Additional File 5 (Continued)**

| <b>Variable name</b>                     | <b>Contribution to final model</b> | <b>Variable Type</b>           | <b>Product type</b> | <b>Spatial summary</b> | <b>Temporal resolution</b> | <b>Monthly lag</b> |
|------------------------------------------|------------------------------------|--------------------------------|---------------------|------------------------|----------------------------|--------------------|
| LST_night.monthly.stdev.synoptic.stdev_0 | 0.901                              | LST night                      | Monthly synoptic    | Standard deviation     | Month only                 | 0                  |
| LST_day_delta_dynamic_stdev_0            | 0.884                              | LST day                        | Delta dynamic       | Standard deviation     | Fully dynamic              | 0                  |
| TSI_delta_monthly_max_4                  | 0.845                              | TSI                            | Delta monthly       | Maximum                | Fully dynamic              | 4                  |
| LST_day.monthly.range.synoptic.stdev_0   | 0.814                              | LST day                        | Monthly synoptic    | Range                  | Month only                 | 0                  |
| LST_night.monthly.stdev.synoptic.stdev_3 | 0.795                              | LST night                      | Monthly synoptic    | Standard deviation     | Month only                 | 3                  |
| LST_delta_delta_monthly_mean_0           | 0.767                              | LST delta                      | Delta monthly       | Mean                   | Fully dynamic              | 0                  |
| TCB_delta_dynamic_mean_4                 | 0.758                              | TCB                            | Delta monthly       | Mean                   | Fully dynamic              | 4                  |
| EVI_delta_monthly_mean_3                 | 0.737                              | EVI                            | Delta monthly       | Mean                   | Fully dynamic              | 3                  |
| population_density_5km.min               | 0.731                              | Population density             | -                   | Minimum                | Stationary                 | N/A                |
| TSI_delta_monthly_stdev_4                | 0.703                              | TSI                            | Delta monthly       | Standard deviation     | Fully dynamic              | 4                  |
| Global_Urban_Footprint_5km_PropUrban     | 0.700                              | Proportion urban in cell (GUF) | -                   | N/A                    | Stationary                 | N/A                |
| EVI.monthly.range.synoptic.stdev_2       | 0.699                              | EVI                            | Monthly synoptic    | Range                  | Month only                 | 2                  |
| LST_night_delta_annual_stdev_2           | 0.674                              | LST night                      | Delta annual        | Standard deviation     | Fully dynamic              | 2                  |
| TCB_monthly_max_4                        | 0.663                              | TCB                            | Monthly             | Maximum                | Fully dynamic              | 4                  |
| LST_delta_all_years_synoptic_max         | 0.655                              | LST delta                      | All-years synoptic  | Maximum                | Stationary                 | N/A                |
| prec57a3                                 | 0.634                              | Precipitation                  | -                   | N/A                    | Stationary                 | N/A                |
| TCW_delta_monthly_mean_4                 | 0.634                              | TCW                            | Delta monthly       | Mean                   | Fully dynamic              | 4                  |
| EVI_delta_monthly_stdev_1                | 0.629                              | EVI                            | Delta monthly       | Standard deviation     | Fully dynamic              | 1                  |
| LST_night.monthly.stdev.synoptic.stdev_4 | 0.626                              | LST night                      | Monthly synoptic    | Standard deviation     | Month only                 | 4                  |
| LST_delta.monthly.mean.synoptic.stdev_0  | 0.618                              | LST delta                      | Monthly synoptic    | Mean                   | Month only                 | 0                  |
| EVI_delta_monthly_mean_4                 | 0.614                              | EVI                            | Delta monthly       | Mean                   | Fully dynamic              | 4                  |
| LST_night_delta_monthly_max_2            | 0.609                              | LST night                      | Delta monthly       | Maximum                | Fully dynamic              | 2                  |
| EVI_delta_dynamic_mean_1                 | 0.598                              | EVI                            | Delta dynamic       | Mean                   | Fully dynamic              | 1                  |
| LST_day_delta_monthly_range_0            | 0.587                              | LST day                        | Delta monthly       | Range                  | Fully dynamic              | 0                  |
| LST_night_delta_monthly_mean_4           | 0.574                              | LST night                      | Delta monthly       | Mean                   | Fully dynamic              | 4                  |
| TCW_delta_annual_stdev_0                 | 0.559                              | TCW                            | Delta annual        | Standard deviation     | Fully dynamic              | 0                  |
| TSI_delta_monthly_max_0                  | 0.532                              | TSI                            | Delta monthly       | Maximum                | Fully dynamic              | 0                  |
| LST_night_delta_annual_stdev_3           | 0.514                              | LST night                      | Delta annual        | Standard deviation     | Fully dynamic              | 3                  |
| TSI.monthly.mean.synoptic.stdev_3        | 0.506                              | TSI                            | Monthly synoptic    | Mean                   | Month only                 | 3                  |
| LST_day.monthly.range.synoptic.stdev_1   | 0.500                              | LST day                        | Monthly synoptic    | Standard deviation     | Month only                 | 1                  |
| TSI_delta_monthly_min_4                  | 0.495                              | TSI                            | Delta monthly       | Minimum                | Fully dynamic              | 4                  |

**Additional File 5 (Continued)**

| Variable name                          | Contribution to final model | Variable Type                         | Product type       | Spatial summary    | Temporal resolution | Monthly lag |
|----------------------------------------|-----------------------------|---------------------------------------|--------------------|--------------------|---------------------|-------------|
| TCB_delta_monthly_mean_0               | 0.477                       | TCB                                   | Delta monthly      | Mean               | Fully dynamic       | 0           |
| viirs_nighttime_5km.mean               | 0.465                       | Nighttime lights                      | -                  | Mean               | Stationary          | N/A         |
| TSI_delta_annual_min_4                 | 0.459                       | TSI                                   | Delta annual       | Minimum            | Fully dynamic       | 4           |
| prec57p1                               | 0.456                       | Precipitation                         | -                  | N/A                | Stationary          | N/A         |
| LST_day_delta_monthly_range_1          | 0.455                       | LST day                               | Delta monthly      | Range              | Fully dynamic       | 1           |
| TSI.monthly.mean.synoptic.stdev_2      | 0.441                       | TSI                                   | Monthly synoptic   | Mean               | Month only          | 2           |
| fraction.class.12                      | 0.437                       | Land cover class fraction             | -                  | N/A                | Yearly              | N/A         |
| LST_day.monthly.stdev.synoptic.stdev_3 | 0.419                       | LST day                               | Monthly synoptic   | Standard deviation | Month only          | 3           |
| TCB_delta_annual_range_3               | 0.406                       | TCB                                   | Delta annual       | Range              | Fully dynamic       | 3           |
| LST_delta.monthly.max.synoptic.mean_2  | 0.404                       | LST delta                             | Monthly synoptic   | Maximum            | Month only          | 2           |
| LST_day_delta_annual_stdev_3           | 0.401                       | LST day                               | Delta annual       | Standard deviation | Fully dynamic       | 3           |
| TCW_delta_monthly_mean_2               | 0.395                       | TCW                                   | Delta monthly      | Mean               | Fully dynamic       | 2           |
| TCB_delta_annual_stdev_2               | 0.395                       | TCB                                   | Delta annual       | Standard deviation | Fully dynamic       | 2           |
| TCB_delta_annual_stdev_4               | 0.394                       | TCB                                   | Delta annual       | Standard deviation | Fully dynamic       | 4           |
| TSI_delta_monthly_range_3              | 0.390                       | TSI                                   | Delta monthly      | Range              | Fully dynamic       | 3           |
| prec57p2                               | 0.386                       | Precipitation                         | -                  | N/A                | Stationary          | N/A         |
| EVI.monthly.mean.synoptic.stdev_2      | 0.385                       | EVI                                   | Monthly synoptic   | Standard deviation | Month only          | 2           |
| LST_day_delta_monthly_stdev_4          | 0.381                       | LST day                               | Delta monthly      | Standard deviation | Fully dynamic       | 4           |
| LST_night_delta_dynamic_mean_1         | 0.376                       | LST night                             | Delta dynamic      | Mean               | Fully dynamic       | 1           |
| EVI_delta_annual_min_0                 | 0.376                       | EVI                                   | Delta annual       | Minimum            | Delta annual        | 0           |
| TCB_delta_monthly_mean_4               | 0.373                       | TCB                                   | Delta monthly      | Mean               | Fully dynamic       | 4           |
| LST_night_delta_monthly_stdev_2        | 0.372                       | LST night                             | Delta monthly      | Standard deviation | Fully dynamic       | 2           |
| EVI_delta_dynamic_range_4              | 0.371                       | EVI                                   | Delta dynamic      | Range              | Fully dynamic       | 4           |
| TCW_delta_dynamic_mean_2               | 0.365                       | TCW                                   | Delta dynamic      | Mean               | Fully dynamic       | 2           |
| LST_night.monthly.min.synoptic.stdev_2 | 0.364                       | LST night                             | Monthly synoptic   | Minimum            | Month only          | 2           |
| TSI_delta_monthly_max_2                | 0.355                       | TSI                                   | Delta monthly      | Maximum            | Fully dynamic       | 2           |
| EVI_all_years_synoptic_range           | 0.354                       | EVI                                   | All-years synoptic | Range              | Stationary          | N/A         |
| LST_day.monthly.min.synoptic.stdev_2   | 0.353                       | LST day                               | Monthly synoptic   | Minimum            | Month only          | 2           |
| DPT                                    | 0.344                       | DPT immunisation coverage (WB annual) | -                  | N/A                | Yearly              | N/A         |
| LST_night_delta_dynamic_min_0          | 0.343                       | LST night                             | Delta dynamic      | Minimum            | Fully dynamic       | 0           |
| LST_night_delta_monthly_min_0          | 0.340                       | LST night                             | Delta monthly      | Minimum            | Fully dynamic       | 0           |

**Additional File 5 (Continued)**

| Variable name                            | Contribution to final model | Variable Type | Product type       | Spatial summary    | Temporal resolution | Monthly lag |
|------------------------------------------|-----------------------------|---------------|--------------------|--------------------|---------------------|-------------|
| TSI_delta_monthly_stdev_2                | 0.339                       | TSI           | Delta monthly      | Standard deviation | Fully dynamic       | 2           |
| EVI_delta_monthly_range_3                | 0.337                       | EVI           | Delta monthly      | Range              | Fully dynamic       | 3           |
| EVI_delta_monthly_range_2                | 0.336                       | EVI           | Delta monthly      | Range              | Fully dynamic       | 2           |
| TSI.monthly.mean.synoptic.stdev_1        | 0.332                       | TSI           | Monthly synoptic   | Mean               | Month only          | 1           |
| TCW_delta_annual_stdev_4                 | 0.332                       | TCW           | Delta annual       | Standard deviation | Fully dynamic       | 4           |
| LST_day_delta_annual_max_1               | 0.328                       | LST day       | Delta annual       | Maximum            | Fully dynamic       | 1           |
| LST_day_delta_monthly_min_3              | 0.328                       | LST day       | Delta monthly      | Minimum            | Fully dynamic       | 3           |
| LST_night.monthly.range.synoptic.mean_1  | 0.325                       | LST night     | Monthly synoptic   | Range              | Month only          | 1           |
| TSI_delta_monthly_min_2                  | 0.321                       | TSI           | Delta monthly      | Minimum            | Fully dynamic       | 2           |
| LST_night_delta_annual_max_2             | 0.320                       | LST night     | Delta annual       | Maximum            | Fully dynamic       | 2           |
| EVI_delta_monthly_min_1                  | 0.319                       | EVI           | Delta monthly      | Minimum            | Fully dynamic       | 1           |
| TCW_delta_annual_stdev_1                 | 0.319                       | TCW           | Delta annual       | Standard deviation | Fully dynamic       | 1           |
| TSI_delta_monthly_range_0                | 0.317                       | TSI           | Delta monthly      | Range              | Fully dynamic       | 0           |
| Africa_TMI_90m.min                       | 0.317                       | TMI           | -                  | Minimum            | Stationary          | N/A         |
| LST_day_delta_monthly_stdev_3            | 0.311                       | LST day       | Delta monthly      | Standard deviation | Fully dynamic       | 3           |
| EVI_all_years_synoptic_min               | 0.310                       | EVI           | All-years synoptic | Minimum            | Stationary          | N/A         |
| TCB_monthly_min_1                        | 0.308                       | TCB           | Monthly            | Minimum            | Fully dynamic       | 1           |
| LST_night.monthly.max.synoptic.stdev_4   | 0.304                       | LST night     | Monthly synoptic   | Maximum            | Month only          | 4           |
| LST_night.monthly.mean.synoptic.stdev_0  | 0.303                       | LST night     | Monthly synoptic   | Mean               | Month only          | 0           |
| LST_night_delta_dynamic_mean_3           | 0.287                       | LST night     | Delta dynamic      | Mean               | Fully dynamic       | 3           |
| TSI.monthly.max.synoptic.stdev_4         | 0.286                       | TSI           | Monthly synoptic   | Maximum            | Month only          | 4           |
| LST_night_delta_dynamic_stdev_0          | 0.285                       | LST night     | Delta dynamic      | Standard deviation | Fully dynamic       | 0           |
| LST_night_delta_annual_range_1           | 0.282                       | LST night     | Delta annual       | Range              | Fully dynamic       | 1           |
| LST_night.monthly.stdev.synoptic.stdev_2 | 0.280                       | LST night     | Monthly synoptic   | Standard deviation | Month only          | 2           |
| EVI_delta_dynamic_stdev_1                | 0.274                       | EVI           | Delta dynamic      | Standard deviation | Fully dynamic       | 1           |
| EVI_delta_dynamic_range_0                | 0.263                       | EVI           | Delta dynamic      | Range              | Fully dynamic       | 0           |
| TCB_delta_annual_range_1                 | 0.259                       | TCB           | Delta annual       | Range              | Fully dynamic       | 1           |
| TSI.monthly.min.synoptic.stdev_0         | 0.257                       | TSI           | Monthly synoptic   | Minimum            | Month only          | 0           |
| TSI.monthly.range.synoptic.mean_3        | 0.255                       | TSI           | Monthly synoptic   | Range              | Month only          | 3           |
| TSI.monthly.range.synoptic.stdev_2       | 0.255                       | TSI           | Monthly synoptic   | Standard deviation | Month only          | 2           |
| TSI.monthly.range.synoptic.stdev_1       | 0.252                       | TSI           | Monthly synoptic   | Standard deviation | Month only          | 1           |
| <b>Additional File 5 (Continued)</b>     |                             |               |                    |                    |                     |             |
| Variable name                            | Contribution to final model | Variable Type | Product type       | Spatial summary    | Temporal resolution | Monthly lag |

|                                          |                                    |                               |                     |                        |                            |                    |
|------------------------------------------|------------------------------------|-------------------------------|---------------------|------------------------|----------------------------|--------------------|
| EVI.monthly.mean.synoptic.stdev_0        | 0.251                              | EVI                           | Monthly synoptic    | Mean                   | Month only                 | 0                  |
| TCB_delta_monthly_mean_1                 | 0.250                              | TCB                           | Delta monthly       | Mean                   | Fully dynamic              | 1                  |
| EVI_delta_monthly_min_0                  | 0.248                              | EVI                           | Delta monthly       | Minimum                | Fully dynamic              | 0                  |
| accessibility_50k_5km.stdev              | 0.246                              | Accessibility                 | -                   | Standard deviation     | Stationary                 | N/A                |
| LST_day_delta_monthly_min_1              | 0.246                              | LST day                       | Delta monthly       | Minimum                | Fully dynamic              | 1                  |
| EVI_delta_monthly_max_2                  | 0.246                              | EVI                           | Delta monthly       | Maximum                | Fully dynamic              | 2                  |
| TSI.monthly.min.synoptic.stdev_4         | 0.240                              | TSI                           | Monthly synoptic    | Minimum                | Month only                 | 4                  |
| TCB.monthly.mean.synoptic.stdev_4        | 0.237                              | TCB                           | Monthly synoptic    | Mean                   | Month only                 | 4                  |
| EVI.monthly.range.synoptic.stdev_0       | 0.233                              | EVI                           | Monthly synoptic    | Range                  | Month only                 | 0                  |
| LST_night_delta_monthly_range_4          | 0.232                              | LST night                     | Delta monthly       | Range                  | Fully dynamic              | 4                  |
| TCW_monthly_stdev_3                      | 0.230                              | TCW                           | Monthly             | Standard deviation     | Fully dynamic              | 3                  |
| TCB_delta_monthly_mean_2                 | 0.228                              | TCB                           | Delta monthly       | Mean                   | Fully dynamic              | 2                  |
| DMSP_F18_5km.max                         | 0.228                              | Nighttime lights              | -                   | Maximum                | Stationary                 | N/A                |
| EVI_delta_dynamic_stdev_3                | 0.228                              | EVI                           | Delta dynamic       | Standard deviation     | Fully dynamic              | 3                  |
| Africa_FA_90m.mean                       | 0.226                              | Elevation (flow accumulation) | -                   | Mean                   | Stationary                 | N/A                |
| accessibility_ESRI_5km.range             | 0.223                              | Accessibility                 | -                   | Range                  | Stationary                 | N/A                |
| prec57a2                                 | 0.223                              | Precipitation                 | -                   | N/A                    | Stationary                 | N/A                |
| EVI_delta_monthly_stdev_0                | 0.222                              | EVI                           | Delta monthly       | Standard deviation     | Fully dynamic              | 0                  |
| EVI_delta_monthly_min_2                  | 0.221                              | EVI                           | Delta monthly       | Minimum                | Fully dynamic              | 2                  |
| LST_night_delta_monthly_range_0          | 0.220                              | LST night                     | Delta monthly       | Range                  | Fully dynamic              | 0                  |
| EVI_delta_monthly_stdev_4                | 0.219                              | EVI                           | Delta monthly       | Standard deviation     | Fully dynamic              | 4                  |
| LST_day.monthly.range.synoptic.stdev_2   | 0.216                              | LST day                       | Monthly synoptic    | Standard deviation     | Month only                 | 2                  |
| TCW_delta_monthly_mean_0                 | 0.214                              | TCW                           | Delta monthly       | Mean                   | Fully dynamic              | 0                  |
| LST_night_delta_dynamic_max_2            | 0.214                              | LST night                     | Delta dynamic       | Maximum                | Fully dynamic              | 2                  |
| LST_delta_delta_monthly_mean_2           | 0.212                              | LST delta                     | Delta monthly       | Mean                   | Fully dynamic              | 2                  |
| TSI_delta_monthly_mean_1                 | 0.209                              | TSI                           | Delta monthly       | Mean                   | Fully dynamic              | 1                  |
| TCB_delta_annual_max_3                   | 0.207                              | TCB                           | Delta annual        | Maximum                | Fully dynamic              | 3                  |
| fraction.class.14                        | 0.203                              | Land cover class fraction     | -                   | N/A                    | Yearly                     | N/A                |
| EVI_delta_annual_stdev_2                 | 0.196                              | EVI                           | Delta annual        | Standard deviation     | Delta annual               | 2                  |
| LST_night.monthly.min.synoptic.stdev_3   | 0.195                              | LST night                     | Monthly synoptic    | Minimum                | Month only                 | 3                  |
| LST_delta_delta_annual_mean_0            | 0.194                              | LST delta                     | Delta annual        | Mean                   | Fully dynamic              | 0                  |
| <b>Additional File 5 (Continued)</b>     |                                    |                               |                     |                        |                            |                    |
| <b>Variable name</b>                     | <b>Contribution to final model</b> | <b>Variable Type</b>          | <b>Product type</b> | <b>Spatial summary</b> | <b>Temporal resolution</b> | <b>Monthly lag</b> |
| LST_day_delta_dynamic_range_2            | 0.193                              | LST day                       | Delta dynamic       | Range                  | Fully dynamic              | 2                  |
| LST_night.monthly.range.synoptic.stdev_1 | 0.192                              | LST night                     | Monthly synoptic    | Range                  | Month only                 | 1                  |

|                                           |       |                                 |                  |                    |               |     |
|-------------------------------------------|-------|---------------------------------|------------------|--------------------|---------------|-----|
| LST_day.monthly.stdev.synoptic.stdev_4    | 0.192 | LST day                         | Monthly synoptic | Standard deviation | Month only    | 4   |
| EVI.monthly.min.synoptic.stdev_4          | 0.188 | EVI                             | Monthly synoptic | Minimum            | Month only    | 4   |
| LST_day_delta_annual_range_4              | 0.187 | LST day                         | Delta annual     | Range              | Fully dynamic | 4   |
| TCW_delta_annual_stdev_3                  | 0.187 | TCW                             | Delta annual     | Standard deviation | Fully dynamic | 3   |
| Africa_TMI_90m.stdev                      | 0.184 | TMI                             | -                | Standard deviation | Stationary    | N/A |
| LST_day.monthly.mean.synoptic.stdev_3     | 0.182 | LST day                         | Monthly synoptic | Mean               | Month only    | 3   |
| LST_night_delta_dynamic_stdev_4           | 0.181 | LST night                       | Delta dynamic    | Standard deviation | Fully dynamic | 4   |
| EVI.monthly.stdev.synoptic.stdev_4        | 0.178 | EVI                             | Monthly synoptic | Standard deviation | Month only    | 4   |
| TSI_monthly_stdev_1                       | 0.178 | TSI                             | Monthly          | Standard deviation | Fully dynamic | 1   |
| Africa_TMI_90m.max                        | 0.176 | TMI                             | -                | Maximum            | Stationary    | N/A |
| TCW_delta_monthly_mean_1                  | 0.167 | TCW                             | Delta monthly    | Mean               | Fully dynamic | 1   |
| adjacencies.class.16                      | 0.163 | Land cover adjacencies          | -                | N/A                | Yearly        | N/A |
| TCW_delta_monthly_mean_3                  | 0.153 | TCW                             | Delta monthly    | Mean               | Fully dynamic | 3   |
| LST_night.monthly.stdev.synoptic.mean_4   | 0.149 | LST night                       | Monthly synoptic | Standard deviation | Month only    | 4   |
| TCW_delta_annual_stdev_2                  | 0.148 | TCW                             | Delta annual     | Standard deviation | Fully dynamic | 2   |
| TSI_monthly_stdev_2                       | 0.146 | TSI                             | Monthly          | Standard deviation | Fully dynamic | 2   |
| LST_day.monthly.range.synoptic.mean_4     | 0.110 | LST day                         | Monthly synoptic | Range              | Month only    | 4   |
| adjacencies.class.8                       | 0.087 | Land cover adjacencies          | -                | N/A                | Yearly        | N/A |
| fraction.class.7                          | 0.071 | Land cover class fraction       | -                | N/A                | Yearly        | N/A |
| fraction.class.2                          | 0.059 | Land cover class fraction       | -                | N/A                | Yearly        | N/A |
| majclass_covariates                       | 0.058 | Land cover majority class       | -                | N/A                | Yearly        | N/A |
| population_density_5km.stdev              | 0.039 | Population density              | -                | Standard deviation | Stationary    | N/A |
| fraction.class.9                          | 0.033 | Land cover class fraction       | -                | N/A                | Yearly        | N/A |
| Africa_slope_90m.min                      | 0.029 | Elevation (slope angle)         | -                | Minimum            | Stationary    | N/A |
| fraction.class.11                         | 0.025 | Land cover class fraction       | -                | N/A                | Yearly        | N/A |
| Global_Urban_Footprint_5km_AnyUrban       | 0.009 | Any urban in cell (GUF)         | -                | N/A                | Stationary    | N/A |
| TCW_delta_annual_max_2                    | 0.008 | TCW                             | Delta annual     | Maximum            | Fully dynamic | 2   |
| fraction.class.5                          | 0.001 | Land cover class fraction       | -                | N/A                | Yearly        | N/A |
| Global_Urban_Footprint_5km_SignificantUrb | 0.000 | Significant urban in cell (GUF) | -                | N/A                | Stationary    | N/A |
