# Supplementary material for: The contribution of non-malarial febrile illness co-infections to Plasmodium falciparum case counts in health facilities in sub-Saharan Africa
Source: Springer Nature journal article supplement (doi:10.1186/s12936-019-2830-y), 2019-06-11
Supplement: MOESM8 [file 16797170]

**Additional File 8. Proportion of each type of fever presenting at public health clinics in each survey, with associated 95% credible intervals. MAF= malaria-attributable fever; NMFI = non-malarial febrile illness; Pf+/Pf- = *P. falciparum* RDT positive or negative (at time of seeking treatment). "MAF and NMFI" indicates febrile children with co-symptomatic MAF and NMFI.**

| Survey                  | MAF Lower CrI | MAF Median | MAF Upper CrI | MAF and NMFI Lower CrI | MAF and NMFI Median | MAF and NMFI Upper CrI | NMFI Pf+ Lower CrI | NMFI Pf+ Median | NMFI Pf+ Upper CrI | NMFI Pf- Lower CrI | NMFI Pf- Median | NMFI Pf- Upper CrI |
|-------------------------|---------------|------------|---------------|------------------------|---------------------|------------------------|--------------------|-----------------|--------------------|--------------------|-----------------|--------------------|
| Angola 2006-2007        | 0.0037        | 0.0192     | 0.0699        | 0.0011                 | 0.0094              | 0.0372                 | 0.1508             | 0.1895          | 0.2095             | 0.7644             | 0.7782          | 0.7817             |
| Angola 2011             | 0.0197        | 0.0340     | 0.0463        | 0.0012                 | 0.0092              | 0.0212                 | 0.0849             | 0.0930          | 0.1029             | 0.8619             | 0.8630          | 0.8641             |
| Angola 2015-2016        | 0.0466        | 0.0691     | 0.0884        | 0.0027                 | 0.0150              | 0.0284                 | 0.0604             | 0.0699          | 0.0818             | 0.8406             | 0.8471          | 0.8518             |
| Benin 2011-2012         | 0.1325        | 0.1654     | 0.2006        | 0.0025                 | 0.0142              | 0.0258                 | 0.0566             | 0.0707          | 0.0886             | 0.7331             | 0.7494          | 0.7628             |
| Burkina Faso 2010       | 0.2092        | 0.2466     | 0.2883        | 0.0151                 | 0.0408              | 0.0578                 | 0.4392             | 0.4723          | 0.5010             | 0.2377             | 0.2406          | 0.2432             |
| Burkina Faso 2014       | 0.1006        | 0.1258     | 0.1491        | 0.0404                 | 0.0634              | 0.0824                 | 0.5176             | 0.5391          | 0.5563             | 0.2707             | 0.2732          | 0.2751             |
| Burundi 2012            | 0.0328        | 0.0500     | 0.0670        | 0.0280                 | 0.0539              | 0.0636                 | 0.2521             | 0.2649          | 0.2805             | 0.6306             | 0.6327          | 0.6347             |
| Cameroon 2011           | 0.0063        | 0.0330     | 0.1166        | 0.0016                 | 0.0136              | 0.0767                 | 0.2334             | 0.3150          | 0.3487             | 0.6146             | 0.6291          | 0.6325             |
| Cote d'Ivoire 2011-2012 | 0.0302        | 0.0554     | 0.0896        | 0.0028                 | 0.0243              | 0.0522                 | 0.2038             | 0.2229          | 0.2437             | 0.6912             | 0.6955          | 0.6989             |
| DR Congo 2013-2014      | 0.0860        | 0.1020     | 0.1197        | 0.0241                 | 0.0382              | 0.0504                 | 0.2537             | 0.2661          | 0.2781             | 0.5909             | 0.5932          | 0.5951             |
| Ghana 2014              | 0.2373        | 0.2699     | 0.3023        | 0.0254                 | 0.0454              | 0.0542                 | 0.2301             | 0.2500          | 0.2710             | 0.4268             | 0.4355          | 0.4439             |
| Ghana 2016              | 0.1287        | 0.1816     | 0.2212        | 0.0010                 | 0.0197              | 0.0504                 | 0.2048             | 0.2274          | 0.2544             | 0.5630             | 0.5716          | 0.5783             |
| Guinea 2012             | 0.0948        | 0.1353     | 0.1755        | 0.0160                 | 0.0516              | 0.0852                 | 0.2888             | 0.3243          | 0.3552             | 0.4844             | 0.4900          | 0.4941             |
| Kenya 2015              | 0.0102        | 0.0233     | 0.0319        | 0.0039                 | 0.0158              | 0.0239                 | 0.0878             | 0.0945          | 0.1014             | 0.8652             | 0.8673          | 0.8690             |
| Liberia 2009            | 0.0303        | 0.0453     | 0.0566        | 0.0265                 | 0.0418              | 0.0482                 | 0.2616             | 0.2699          | 0.2787             | 0.6427             | 0.6451          | 0.6470             |
| Liberia 2011            | 0.0473        | 0.0626     | 0.0740        | 0.0321                 | 0.0459              | 0.0575                 | 0.3890             | 0.4002          | 0.4119             | 0.4914             | 0.4928          | 0.4942             |
| Liberia 2016            | 0.0226        | 0.0474     | 0.0832        | 0.0274                 | 0.0659              | 0.0814                 | 0.3913             | 0.4084          | 0.4255             | 0.4796             | 0.4807          | 0.4818             |
| Madagascar 2011         | 0.0221        | 0.0376     | 0.0575        | 0.0011                 | 0.0095              | 0.0238                 | 0.0590             | 0.0708          | 0.0830             | 0.8787             | 0.8803          | 0.8813             |
| Madagascar 2013         | 0.0750        | 0.0916     | 0.1085        | 0.0017                 | 0.0077              | 0.0166                 | 0.0422             | 0.0517          | 0.0638             | 0.8417             | 0.8487          | 0.8535             |
| Madagascar 2016         | 0.0487        | 0.0594     | 0.0704        | 0.0007                 | 0.0051              | 0.0101                 | 0.0251             | 0.0321          | 0.0400             | 0.8996             | 0.9036          | 0.9060             |
| Malawi 2012             | 0.0761        | 0.1060     | 0.1379        | 0.0153                 | 0.0373              | 0.0582                 | 0.3685             | 0.3959          | 0.4180             | 0.4607             | 0.4625          | 0.4637             |
| Malawi 2014             | 0.1218        | 0.1669     | 0.2021        | 0.0195                 | 0.0512              | 0.0761                 | 0.3956             | 0.4218          | 0.4502             | 0.3611             | 0.3628          | 0.3641             |
| Mali 2012-2013          | 0.3929        | 0.4264     | 0.4512        | 0.0018                 | 0.0141              | 0.0325                 | 0.0840             | 0.0999          | 0.1192             | 0.4520             | 0.4597          | 0.4664             |
| Mali 2015               | 0.1092        | 0.1393     | 0.1645        | 0.0056                 | 0.0207              | 0.0514                 | 0.2054             | 0.2198          | 0.2370             | 0.6120             | 0.6176          | 0.6229             |
| Mozambique 2011         | 0.1591        | 0.1876     | 0.2137        | 0.0094                 | 0.0268              | 0.0439                 | 0.2121             | 0.2292          | 0.2484             | 0.5469             | 0.5567          | 0.5647             |
| Mozambique 2015         | 0.1409        | 0.1707     | 0.2009        | 0.0183                 | 0.0501              | 0.0669                 | 0.3052             | 0.3269          | 0.3459             | 0.4465             | 0.4537          | 0.4591             |
| Nigeria 2010            | 0.0969        | 0.1073     | 0.1159        | 0.0557                 | 0.0629              | 0.0670                 | 0.4051             | 0.4162          | 0.4282             | 0.4129             | 0.4140          | 0.4151             |

**Additional File 8 (Continued)**

| Survey                    | MAF Lower CrI | MAF Median | MAF Upper CrI | MAF and NMFI Lower CrI | MAF and NMFI Median | MAF and NMFI Upper CrI | NMFI Pf+ Lower CrI | NMFI Pf+ Median | NMFI Pf+ Upper CrI | NMFI Pf- Lower CrI | NMFI Pf- Median | NMFI Pf- Upper CrI |
|---------------------------|---------------|------------|---------------|------------------------|---------------------|------------------------|--------------------|-----------------|--------------------|--------------------|-----------------|--------------------|
| <b>Nigeria 2015</b>       | 0.0872        | 0.1020     | 0.1149        | 0.0225                 | 0.0333              | 0.0446                 | 0.3580             | 0.3693          | 0.3820             | 0.4949             | 0.4960          | 0.4970             |
| <b>Rwanda 2010</b>        | 0.0084        | 0.0158     | 0.0198        | 0.0008                 | 0.0041              | 0.0062                 | 0.0206             | 0.0237          | 0.0291             | 0.9560             | 0.9569          | 0.9579             |
| <b>Rwanda 2014-2015</b>   | 0.0670        | 0.0835     | 0.0958        | 0.0011                 | 0.0111              | 0.0196                 | 0.0807             | 0.0886          | 0.0979             | 0.8163             | 0.8177          | 0.8186             |
| <b>Senegal 2008-2009</b>  | 0.0019        | 0.0120     | 0.0470        | 0.0006                 | 0.0055              | 0.0312                 | 0.0906             | 0.1218          | 0.1376             | 0.8563             | 0.8568          | 0.8570             |
| <b>Senegal 2010-2011</b>  | 0.0241        | 0.0318     | 0.0378        | 0.0003                 | 0.0040              | 0.0087                 | 0.0131             | 0.0156          | 0.0192             | 0.9453             | 0.9487          | 0.9512             |
| <b>Senegal 2012-2013</b>  | 0.0017        | 0.0104     | 0.0409        | 0.0004                 | 0.0046              | 0.0270                 | 0.0341             | 0.0594          | 0.0731             | 0.9201             | 0.9215          | 0.9217             |
| <b>Senegal 2015</b>       | 0.0005        | 0.0033     | 0.0111        | 0.0001                 | 0.0011              | 0.0069                 | 0.0040             | 0.0097          | 0.0137             | 0.9838             | 0.9847          | 0.9849             |
| <b>Tanzania 2007-2008</b> | 0.0013        | 0.0055     | 0.0192        | 0.0006                 | 0.0038              | 0.0162                 | 0.1773             | 0.1903          | 0.1961             | 0.7971             | 0.7993          | 0.8003             |
| <b>Tanzania 2011-2012</b> | 0.0426        | 0.0539     | 0.0621        | 0.0073                 | 0.0164              | 0.0201                 | 0.0738             | 0.0789          | 0.0852             | 0.8490             | 0.8517          | 0.8541             |
| <b>Tanzania 2015-2016</b> | 0.0682        | 0.0765     | 0.0828        | 0.0089                 | 0.0163              | 0.0185                 | 0.0787             | 0.0840          | 0.0892             | 0.8210             | 0.8244          | 0.8273             |
| <b>Togo 2013-2014</b>     | 0.1614        | 0.2052     | 0.2387        | 0.0051                 | 0.0290              | 0.0630                 | 0.2061             | 0.2314          | 0.2578             | 0.5269             | 0.5358          | 0.5440             |
| <b>Uganda 2009</b>        | 0.0631        | 0.0738     | 0.0819        | 0.0457                 | 0.0594              | 0.0646                 | 0.5088             | 0.5187          | 0.5299             | 0.3486             | 0.3497          | 0.3510             |
| <b>Uganda 2014-2015</b>   | 0.0705        | 0.0878     | 0.0996        | 0.0282                 | 0.0523              | 0.0599                 | 0.3356             | 0.3460          | 0.3588             | 0.5155             | 0.5167          | 0.5181             |
| <b>Uganda 2016</b>        | 0.0485        | 0.0694     | 0.0910        | 0.0281                 | 0.0625              | 0.0709                 | 0.3687             | 0.3822          | 0.4011             | 0.4857             | 0.4890          | 0.4919             |
